## 1 Passenger mutations confound phenotypes of SARM1-deficient mice

2  
3 Melissa B. Uccellini<sup>1,2</sup>, Susana V. Bardina<sup>1</sup>, Maria Teresa Sánchez-Aparicio<sup>1,2</sup>, Kris M. White<sup>1,2</sup>, Ying-Ju Hou<sup>5</sup>, Jean K. Lim<sup>1</sup>, and Adolfo García-Sastre<sup>1,2,3,4,6</sup>

5  
6 <sup>1</sup>Department of Microbiology, <sup>2</sup>Global Health and Emerging Pathogens Institute, <sup>3</sup>Department of Medicine, Division of Infectious Diseases and <sup>4</sup>The Tisch Cancer Institute Icahn School of Medicine at Mount Sinai, New York, NY 10029

7  
8  
9 <sup>5</sup>Previous address: Department of Microbiology and Immunology, Weill Medical College of Cornell University, New York, NY 10021 (previous address)

10  
11 <sup>6</sup>Correspondence: P: 212-241-7769, F: 212-534-1684, E: [adolfo.garcia-sastre@mssm.edu](mailto:adolfo.garcia-sastre@mssm.edu)

### 12 13 Abstract

14 The Toll/IL-1R domain-containing adaptor protein SARM1 is expressed primarily in the brain, where it mediates axonal degeneration. Additional roles for SARM1 in a number of other processes including TLR-signaling, viral infection, chemokine expression, and expression of the proapoptotic protein XAF1 have also been described. Much of the supporting evidence for SARM1 function has been generated by comparing WT C57BL/6 (B6) mice to SARM1-deficient mice backcrossed to the B6 background. Here we show that the *Sarm1* gene lies in a gene-rich region encompassing XAF1, and the MIP and MCP chemokine family loci among other genes. Because gene-targeting of SARM1-deficient strains was done with 129 ES cells and these genes are too close to segregate, they remain 129 in sequence. As this could account for phenotypes attributed to SARM1, we generated new knockout mouse strains on a pure B6 background using CRISPR. Experiments in these new strains confirmed the role of SARM1 in axonal degeneration and susceptibility to WNV infection, but not in susceptibility to VSV or LACV infection, or chemokine or *Xaf1* expression. Notably, the *Xaf1* gene shows sequence variation between B6 and 129, resulting in coding changes and novel splice variants. Given its known role in apoptosis, XAF1 variants may account for some phenotypes described in previously made SARM1-deficient strains. RNAseq in the new strains reveal changes in the mitochondrial electron transport chain and ribosomal proteins, suggesting possible downstream targets of SARM1. Re-evaluation of described phenotypes in these new strains will be critical for defining the function of SARM1.

### 15 16 17 18 19 20 21 22 23 24 25 26 27 28 29 30 31 32 Introduction

33 Sterile alpha and TIR motif containing 1 (SARM1) is an intracellular protein that is highly expressed in the brain, and is comprised of a C-terminal Toll-interleukin receptor (TIR) domain, 2 central sterile alpha motif (SAM) domains, and an N-terminal region containing multiple armadillo repeat motifs (ARMs) (1). SARM1 is essential in Wallerian degeneration - a neuronal cell death program involving MAPK signaling, influx of calcium, and proteolysis of structural proteins resulting in axonal degeneration distal to the site of injury (2, 3). Although the mechanism is not fully elucidated, SARM1 appears to be the master executioner in this cascade (4). Mechanistic and structural studies suggest that the SARM1 TIR domain possesses intrinsic NAD<sup>+</sup> cleavage activity (5-7), which is regulated by JNK-mediated phosphorylation of Ser-548 leading to inhibition of mitochondrial respiration (8).

34  
35  
36  
37  
38  
39  
40  
41  
42 Because of the presence of the TIR domain, it was originally postulated that SARM1 would function in TLR signaling similar to the other cytosolic TIR-domain containing proteins MYD88, MAL, TRIF, and TRAM. In addition, the *C.elegans* and *Drosophila* orthologs *tir-1* and *dSARM (ect-4)* appear to have roles in immunity (9-11). However, unlike the other four adaptor proteins, overexpression of SARM1 did not lead to NF- $\kappa$ B or IRF3 activation, but rather inhibited TLR signaling (12). Overexpression studies have supported a role for SARM1 in suppressing TLR responses, however studies in knockout mice have not (1). Importantly, the SARM1 TIR domain appears to be evolutionarily ancestral to the mammalian TLR adaptors because of its closer homology to bacterial TIR domains, suggesting that it may not function as a TLR adapter (13, 14).

43  
44  
45  
46  
47  
48  
49  
50  
51  
52  
53 SARM1 also appears to play a role in susceptibility to infections of the CNS. Two knockout strains for SARM1 have been generated, one in the Ding lab here referred to as *Sarm1<sup>AD</sup>* (1) and one in the Diamond lab here referred to as *Sarm1<sup>MSD</sup>* (15). *Sarm1<sup>MSD</sup>* mice are more susceptible to West Nile virus infection (WNV), and produce less TNF- $\alpha$  (15). In contrast, *Sarm1<sup>MSD</sup>* mice are protected from lethal La

57 Crosse virus infection (LACV) (16). Our previous studies found that *Sarm1<sup>AD</sup>* mice were also protected  
 58 from lethal Vesicular Stomatitis virus (VSV) infection, and produced less cytokines and chemokines in the  
 59 brain (17). A role for SARM1 has only been shown for infections in the CNS – we did not find differences  
 60 in the susceptibility of *Sarm1<sup>AD</sup>* mice to *M.tuberculosis*, *L. monocytogenes*, or influenza virus infection  
 61 (17). When *Sarm1<sup>AD</sup>* macrophages were examined in response to a variety of TLR ligands no differences  
 62 were found in the production of TNF- $\alpha$  or CCL2 (1). However, SARM1 was reported to regulate CCL5  
 63 production in *Sarm1<sup>AD</sup>* macrophages. This defect was specific to CCL5, occurred in response to TLR and  
 64 non-TLR stimuli, did not involve known signaling intermediates, but was associated with recruitment of  
 65 RNA pol II and transcription factors to the CCL5 locus (18). A recent report also described both positive  
 66 and negative roles for SARM1 in inflammasome activation in *Sarm1<sup>AD</sup>* mice, whereby SARM1 positively  
 67 regulates pyroptosis but negatively regulates IL-1 $\beta$  secretion (19).  
 68

69 We previously reported upregulation of *Xaf1* transcripts in the brains of uninfected and VSV-infected  
 70 *Sarm1<sup>AD</sup>* mice compared to WT mice (17). Zhu et al recently described a similar phenotype in *Sarm1<sup>MSD</sup>*  
 71 mice, and reported that SARM1 modulates *Xaf1* transcript expression and caspase-mediated cell death  
 72 (20). X-linked inhibitor of apoptosis (XIAP)-associated factor (XAF1) is a proapoptotic IFN-stimulated  
 73 gene that is epigenetically silenced in a broad range of human tumors. XAF1 appears to induce apoptosis  
 74 through a variety of mechanisms including binding and inhibiting XIAP (21), and binding p53 displacing  
 75 MDM2 leading to cell death (22). Several isoforms of *Xaf1* have been described, including full-length and  
 76 truncated forms. Full-length isoforms are frequently downregulated in human tumors, while truncated  
 77 isoforms are upregulated. Importantly, short forms have been reported to have dominant negative effects  
 78 (22, 23).  
 79

## 80 Results

### 81 **Macrophages derived from *Sarm1<sup>AD</sup>* mice are defective in the production of *Ccl3*, *Ccl4*, and *Ccl5***

82 We stimulated bone marrow-derived macrophages with TLR ligands, or infected with viruses known to  
 83 activate the RLR sensing pathway and measured cytokine and chemokine production by ELISA. For this  
 84 purpose we compared WT C57BL/6J (B6) mice to SARM1-deficient mice generated in the Ding lab and  
 85 backcrossed 10 times to the B6 background, here referred to as *Sarm1<sup>AD</sup>* (see Table I for background  
 86 details of the mice used in this study). We found that while TNF- $\alpha$  and IFN- $\alpha$  production were normal in  
 87 *Sarm1<sup>AD</sup>* macrophages, CCL3 production was defective in response to all stimuli tested (Fig 1A). We next  
 88 asked if the defect in chemokine production occurred at the transcriptional level. *Sarm1<sup>AD</sup>* macrophages  
 89 showed defects in the production of *Ccl3*, *Ccl4*, and *Ccl5* mRNA in response to LPS stimulation at a  
 90 number of time points, but no defects in the production of *Il1b* or *Ifnb1* (Fig 1B, top), similar to results  
 91 reported for *Ccl5* (18). Given that we saw defects in chemokine production in response to a variety of TLR  
 92 stimuli, we next asked if signaling in response to TNF- $\alpha$ , which does not use the TLR adaptor proteins  
 93 MYD88 or TRIF, was defective in *Sarm1<sup>AD</sup>* macrophages. *Sarm1<sup>AD</sup>* macrophages again showed defects  
 94 in the production of *Ccl3*, *Ccl4*, and *Ccl5* mRNA, but not *Il1b* or *Ifnb1* (Fig 1B, bottom). This suggested  
 95 that the defect in chemokine production in *Sarm1<sup>AD</sup>* macrophages was not specific to the TLR signaling  
 96 pathway.  
 97

98 Table I. Summary of *Sarm1* mouse lines and phenotypes

| Allele                       | Ref        | Neo | Congenic interval | Genetic background | Axonal degeneration | VSV | LACV                 | WNV | Chemokines |
|------------------------------|------------|-----|-------------------|--------------------|---------------------|-----|----------------------|-----|------------|
| <i>Sarm1<sup>AD</sup></i>    | 1          | Y   | 129               | 99.5% B6           | protected           | ↓   | WT (original strain) | WT  | ↓          |
| <i>Sarm1<sup>MSD</sup></i>   | 15         | N   | 129               | 94.6% B6           | *                   | ND  | ↓(1978 strain)       | ↑   | ND         |
| <i>Sarm1<sup>AGS3</sup></i>  | this study | N   | None              | 100% B6            | protected           | WT  | WT (original strain) | ↑   | WT         |
| <i>Sarm1<sup>AGS12</sup></i> | this study | N   | None              | 100% B6            | ND                  | WT  | WT (original strain) | ND  | WT         |

99 ND=not done, ↓= decreased susceptibility, ↑= increased susceptibility \*Protection from axonal degeneration has been shown in  
 100 many studies, but the strain is often not specified  
 101  
 102  
 103  
 104

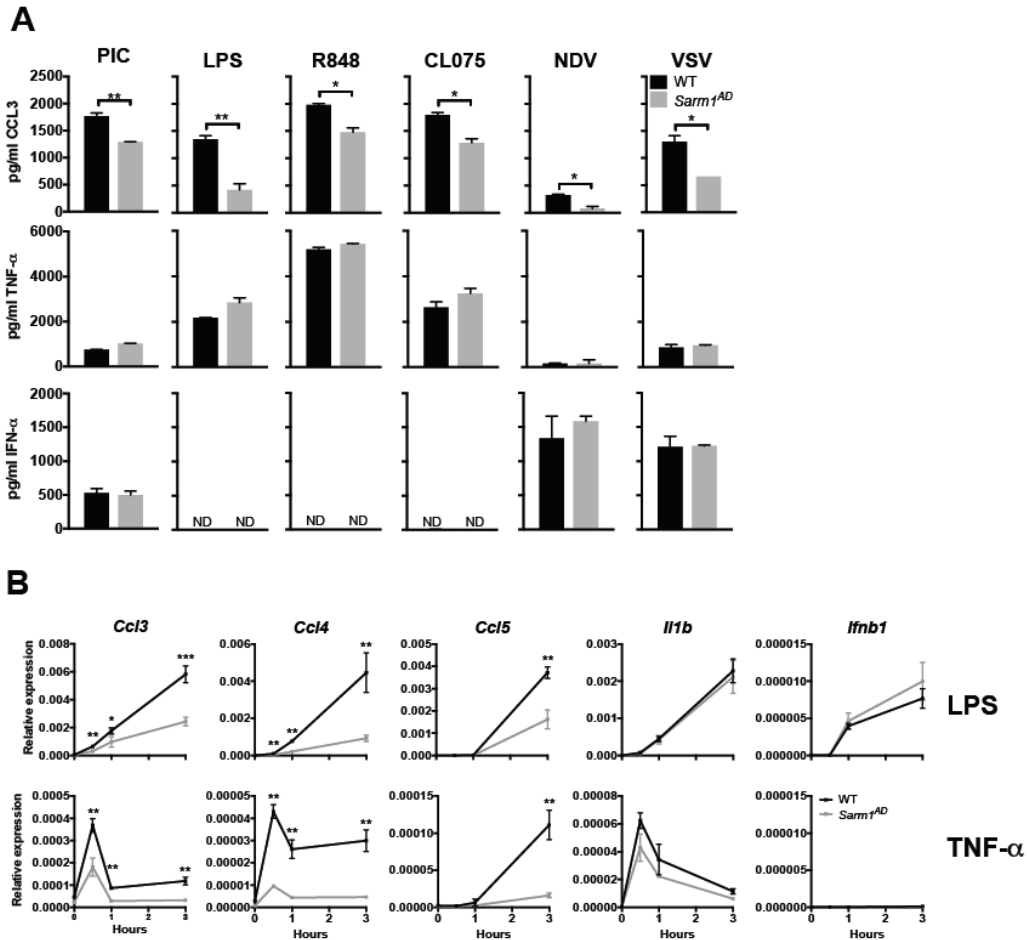

**FIGURE 1. Macrophages from *Sarm1*<sup>AD</sup> mice have a defect in the production of *Ccl3*, *Ccl4*, and *Ccl5*.** (A) WT and *Sarm1*<sup>AD</sup> macrophages were stimulated with 100  $\mu$ g/ml PIC, 5  $\mu$ g/ml LPS, 0.01  $\mu$ g/ml R848, 10  $\mu$ g/ml CL075, or NDV or VSV at an MOI of 5 for 24 hrs. and cytokine production was measured by ELISA. (B) WT and *Sarm1*<sup>AD</sup> macrophages were stimulated with 1  $\mu$ g/ml LPS or TNF- $\alpha$  and cytokine production was measured by qPCR at the indicated time points. Graphs show mean $\pm$ SD for triplicate biological replicates and are representative of 3 experiments. \* $p$ <0.05 and \*\* $p$ <0.01 (unpaired t test).

### *Macrophages derived from *Sarm1*<sup>AD</sup> mice show normal signaling responses*

We saw defects in the production of chemokines in *Sarm1*<sup>AD</sup> macrophages in response to both LPS and TNF- $\alpha$  stimulation, suggesting that SARM1 does not function at the level of the TLR-adaptor proteins MYD88 or TRIF. However, both LPS and TNF- $\alpha$  signaling activate the NF- $\kappa$ B and MAPK signaling pathways (24, 25). We therefore examined activation of these pathways in *Sarm1*<sup>AD</sup> macrophages by western blot. No differences were observed in the degradation of I $\kappa$ B $\alpha$ , or the phosphorylation of JNK, ERK, or p38 in response to either LPS or TNF- $\alpha$  stimulation, suggesting that SARM1 does not regulate induction of the NF- $\kappa$ B or MAPK pathways (Fig 2A and B). LPS also activates PI3 kinase signaling resulting in phosphorylation of Akt (26), however no differences in p-Akt levels were observed in *Sarm1*<sup>AD</sup> macrophages in response to LPS (Fig 2C). In addition, PLC $\gamma$ -2 and intracellular calcium are required for TLR4 endocytosis in response to LPS (27). However, we again saw no differences in intracellular Ca<sup>2+</sup> flux in *Sarm1*<sup>AD</sup> macrophages in response to LPS or ATP stimulation (Fig 2D).

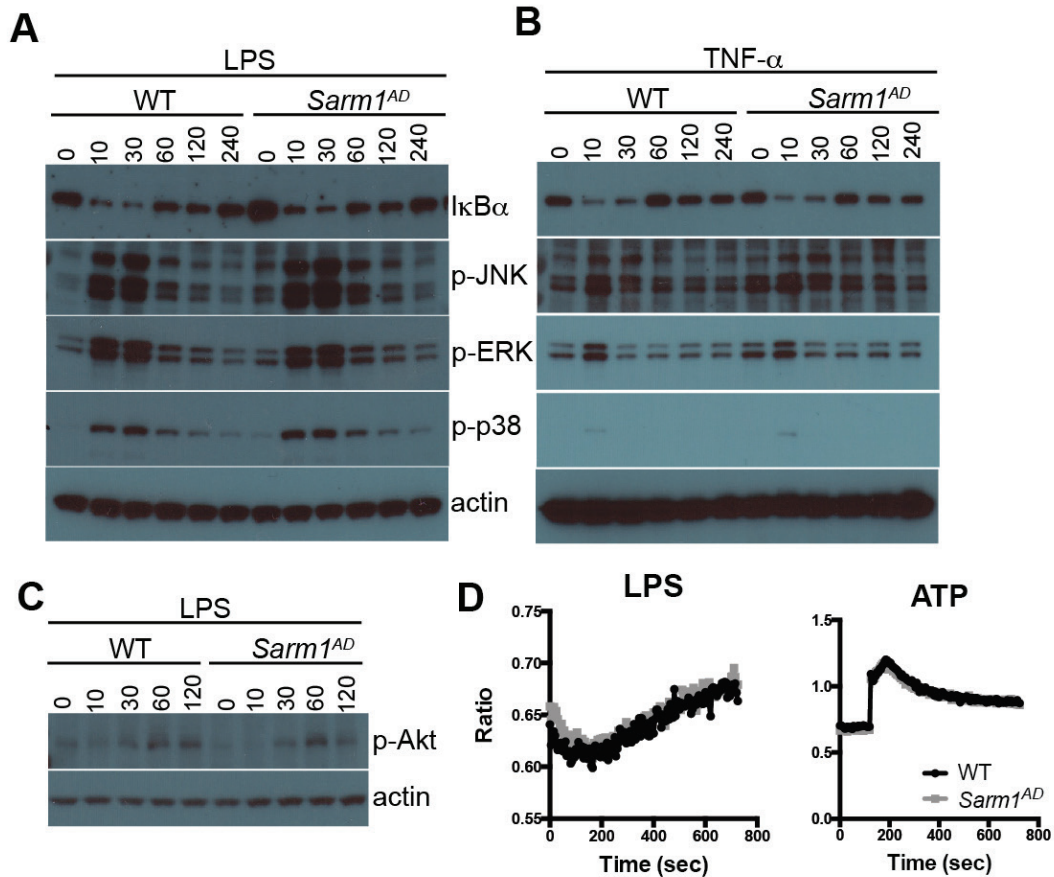

125  
 126 **FIGURE 2. Macrophages from *Sarm1<sup>AD</sup>* mice display normal signaling responses.** WT and *Sarm1<sup>-/-</sup>*  
 127 macrophages were stimulated with 10 ng/ml LPS (A and C) or TNF- $\alpha$  (B) for the indicated number of minutes and  
 128 signaling responses were measured by western blot. (D) WT and *Sarm1<sup>-/-</sup>* macrophages were stimulated with 100  
 129 ng/ml LPS or 1 mM ATP and calcium flux was measured by fura-2-AM fluorescence. Data is representative of 3  
 130 experiments.  
 131

132 **The MIP and MCP chemokine family loci are within the *Sarm1* 129 congenic locus**

133 Given that we saw defects only in *Ccl3*, *Ccl4*, and *Ccl5* production but not in other cytokines, that the  
 134 defects occurred in response to a wide variety of stimuli, and that no defects in the induction pathways for  
 135 these cytokines could be found – we considered the possibility that the observed defect was due to the  
 136 genetic background of the knockout mouse rather than lack of SARM1 expression. The *Sarm1<sup>AD</sup>* strain  
 137 was made by replacing exons 3-6 with a neomycin resistance gene in reverse orientation in 129 ES cells,  
 138 before backcrossing 10 times to the B6 background (1). The *Ccl3*, *Ccl4*, and *Ccl5* genes and the *Sarm1*  
 139 gene are both located on mouse chromosome 11, and are separated by only ~5 Mb (Fig 3A). Despite  
 140 backcrossing 10 times, the probability of a region of 5 cM (~6.75 Mb for chromosome 11(28)) of 129  
 141 genetic material flanking both sides of the knockout gene is 0.63, making it likely that the chemokine  
 142 locus in *Sarm1<sup>AD</sup>* mice is of 129 origin. In order to check the genetic background of genes proximal to  
 143 *Sarm1*, we sequenced two SNPs in the *Ccl5* gene that differ between the 129 and B6 strains, which  
 144 confirmed that the *Ccl5* locus of the *Sarm1<sup>AD</sup>* strain is derived from the 129 strain (Fig 3B).  
 145

146 We next asked whether the production of other cytokines and chemokines located on different  
 147 chromosomes was different between WT and *Sarm1<sup>AD</sup>* macrophages. We again saw differences in the  
 148 production of *Ccl3*, *Ccl4*, and *Ccl5* mRNA, but we failed to find significant differences between other  
 149 cytokines or chemokines in different chromosomal locations (Fig 3C). The MCP chemokine region falls  
 150 between the *Sarm1* gene and the MIP chemokine region, and is therefore of 129 genetic origin, however  
 151 no differences in the induction of *Ccl1*, *Ccl2*, or *Ccl7* were observed. *Il12b*, which is also located on  
 152 chromosome 11, showed increased production in the *Sarm1<sup>AD</sup>* strain. In addition to induced conditions

153 (Fig 3D, top), we also observed differences in the basal expression of *Ccl3*, *Ccl4*, and *Ccl5* mRNA  
 154 between WT, *Sarm1*<sup>+AD</sup>, and *Sarm1*<sup>AD/AD</sup> macrophages in the absence of stimulation (Fig 3D, bottom),  
 155 supporting an intrinsic difference between the strains.  
 156

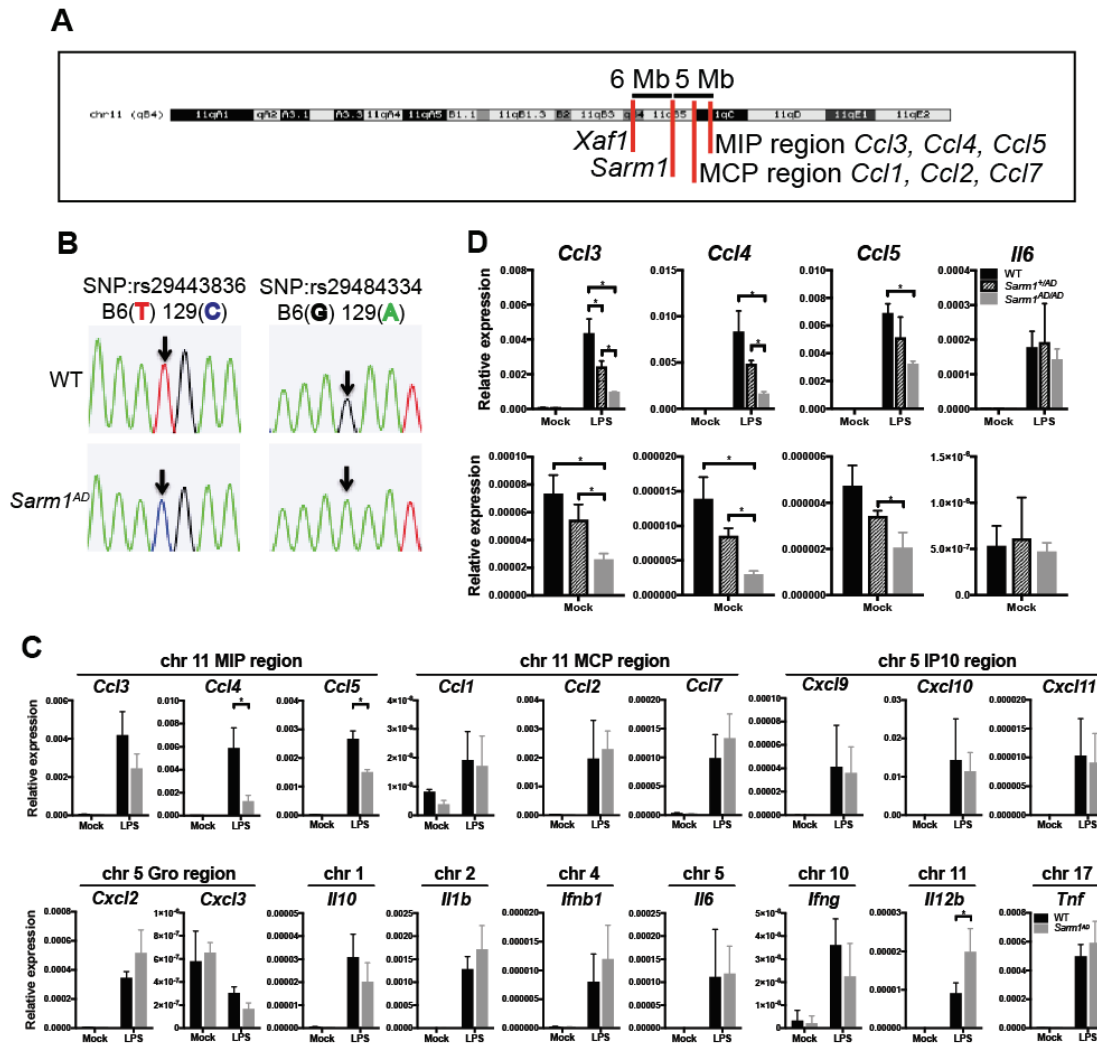

157  
 158 **FIGURE 3. *Ccl3*, *Ccl4*, *Ccl5* and *Xaf1* are within the *Sarm1*<sup>AD</sup> 129 congenic locus.** (A) Chromosomal location of  
 159 the *Sarm1* gene, chemokine locus, and *Xaf1* gene (UCSC genome browser). (B) Sequence analysis of SNPs in the  
 160 *Ccl5* gene of WT and *Sarm1*<sup>AD</sup> mice. (C) WT and *Sarm1*<sup>AD</sup> macrophages were stimulated with 10 ng/ml LPS for 3 hrs.  
 161 and cytokine production was measured by qPCR. (D) WT, *Sarm1*<sup>+AD</sup>, and *Sarm1*<sup>AD/AD</sup> macrophages were stimulated  
 162 as in C (bottom graph shows the same data as the top on a different scale). C and D show mean  $\pm$  SD for triplicate  
 163 biological replicates and are representative of 2 experiments. \* $p < 0.05$  (unpaired t test).

164 ***SARM1* knockdown and overexpression fail to regulate *Ccl3*, *Ccl4*, and *Ccl5* levels**

165 We next examined the role of SARM1 expression on chemokine production in a cell line, lacking the  
 166 confounding genetic background of the *Sarm1*<sup>AD</sup> mouse strain. We first examined *Sarm1* expression in  
 167 the mouse macrophage cell line RAW264.7 expressing a control V5 epitope tag (RAW-V5). We found  
 168 very low levels of *Sarm1* mRNA expression, making knockdown efficiency difficult to access (Fig 4A, left).  
 169 This is in agreement with reports suggesting very low or no expression in mouse macrophages (1, 15).  
 170 Upon treatment with LPS, no differences in *Ccl4* induction were found with knockdown (Fig 4A, right). In  
 171 order to determine knockdown efficiency, we repeated the experiment in RAW264.7 cells overexpressing  
 172 V5-tagged SARM1 (RAW-SARM1-V5). Under these conditions, *Sarm1* mRNA was detectable, and  
 173 siSARM1-1 and siSARM1-3 reduced transcript expression by 10x and 7x, respectively, confirming

174 knockdown (Fig 4B, left). Western blot for Sarm1-V5 expression revealed siSARM1-1 and siSARM1-3  
 175 reduced protein levels by 40% and 30%, respectively (Fig 4C and S1). The low knockdown efficiency is  
 176 likely due to high SARM1 expression from the CMV promoter, but nonetheless confirms the efficacy of the  
 177 siRNAs. However, upon LPS stimulation, again no differences in *Ccl4* mRNA induction were detectable in  
 178 RAW-SARM1-V5 cells (Fig 4B, right). We next performed knockdown in macrophages from WT and  
 179 *Sarm1<sup>AD</sup>* mice. We were unable to detect *Sarm1* mRNA expression in macrophages, and no reliable  
 180 antibodies are available (1, 15, 17, 18), so we could not access knockdown efficiency. We again found  
 181 that basal levels of *Ccl4* mRNA were reduced in *Sarm1<sup>AD</sup>* macrophages compared to WT macrophages,  
 182 however siRNA treatment of WT macrophages failed to downregulate *Ccl4* levels (Fig 4D). Lastly, we  
 183 determined whether overexpression of SARM1 in RAW cells modulated chemokine induction in response  
 184 to LPS. As shown in Figure 4E, no differences in chemokine levels were observed upon overexpression  
 185 of SARM1. The limited chemokine defects, lack of signaling defects, and lack of support from knockdown  
 186 or overexpression, as well as the close proximity of the *Ccl3*, *Ccl4*, and *Ccl5* genes to the *Sarm1* gene  
 187 makes it likely that the congenic interval rather than SARM1 protein expression contributes to differences  
 188 in basal and induced levels of *Ccl3*, *Ccl4*, and *Ccl5* between WT and *Sarm1<sup>AD</sup>* mice.

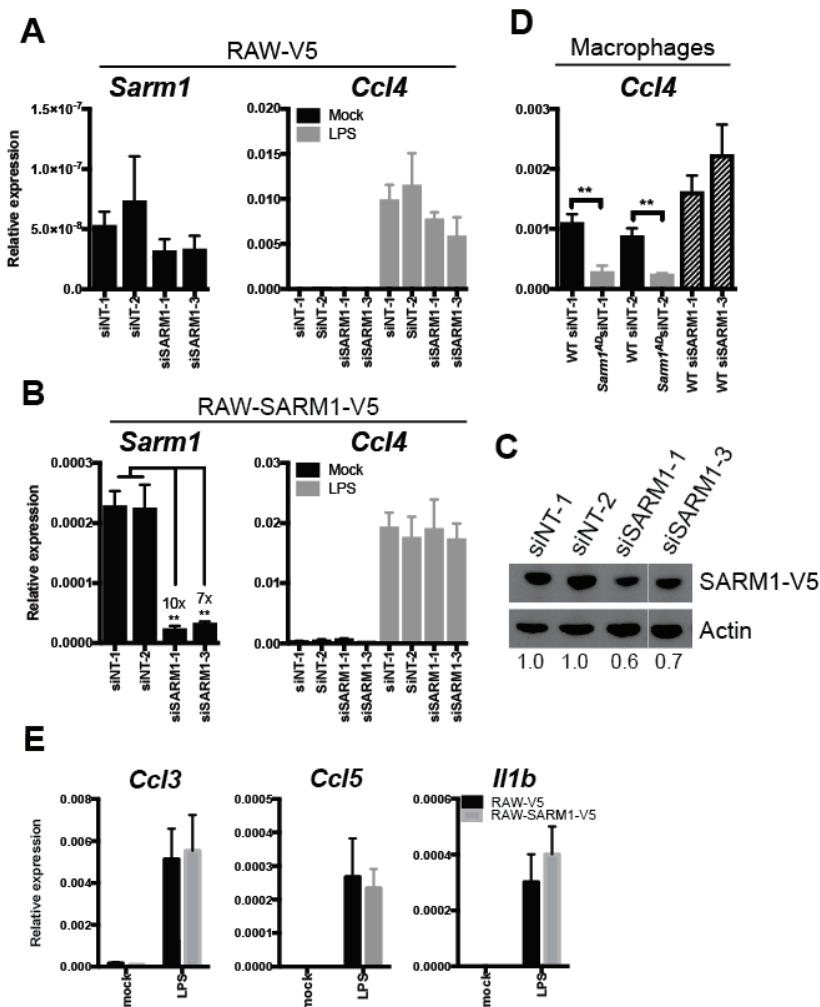

189 **FIGURE 4. SARM1 knockdown and overexpression do not modulate chemokine production.** (A) RAW-V5 cells  
 190 were treated with *Sarm1* siRNAs and *Sarm1* knockdown efficiency was measured by qPCR (left) or *Ccl4* expression  
 191 was measured after treatment with 10 ng/ml LPS for 3 hrs. (right). (B) RAW-SARM1-V5 cells treated as in A. (C)  
 192 Western blot of SARM1 expression in RAW-SARM1-V5 cells treated with *Sarm1* siRNAs. (D) Basal expression of  
 193 *Ccl4* in WT and *Sarm1<sup>AD</sup>* macrophages by qPCR after *Sarm1* siRNA knockdown. (E) RAW-V5 and RAW-SARM1-V5  
 194 cells were treated with 10 ng/ml LPS and cytokine production was measured at 3 hrs. by qPCR. Graphs show  
 195 mean $\pm$ -SD of triplicate biological samples and are representative of 2 experiments. \*\*p<0.01 (unpaired t test).  
 196

197 ***Sarm1* CRISPR knockout mice on a pure B6 background show no macrophage chemokine defects**  
198 In order to formally exclude a role for SARM1 in chemokine induction, we generated new knockout mouse  
199 strains using CRISPR-mediated genome engineering on a pure B6 background. A high-scoring guide  
200 sequence that was unlikely to produce off-target cleavage was located in exon 1 of the *Sarm1* gene (29).  
201 This guide sequence was cloned into the pSpCas9(BB)-2A-GFP vector and injected into one-cell stage  
202 C57BL/6J embryos. Resulting pups were characterized at the *Sarm1* locus, as well as at potential off-  
203 target sites. Two knockout alleles were generated using this approach, termed *Sarm1*<sup>AGS3</sup> and  
204 *Sarm1*<sup>AGS12</sup>. The *Sarm1*<sup>AGS3</sup> allele is a 62 b.p. deletion resulting in a frameshift and a 38 a.a. product; the  
205 *Sarm1*<sup>AGS12</sup> allele is a 13 b.p. deletion resulting in a frameshift and a 74 a.a. product (Table II and Fig  
206 S2A). The 62 b.p. deletion in the *Sarm1*<sup>AGS3</sup> allele was evident by PCR of *Sarm1* genomic DNA (Fig S2B,  
207 left). The 13 b.p. deletion in the *Sarm1*<sup>AGS12</sup> allele was too small to be detected on an agarose gel, but  
208 was detected using the Surveyor Nuclease assay (S2B, right). The guide sequence used for *Sarm1*  
209 cleavage was high scoring and no potential off-target sites were present with less than 4 mismatches,  
210 making CRISPR cleavage at off-target sites unlikely (30). Nonetheless, we tested 5 potential off-target  
211 sites located in exonic regions that could potentially affect these genes. We did not detect cleavage  
212 events at any of these sites as determined by the Surveyor Nuclease assay (Fig S2C).  
213

214 Table II. *Sarm1* Alleles

| Allele                       | Deletion (bp) | Nucleotide position | Protein length (aa) |
|------------------------------|---------------|---------------------|---------------------|
| WT                           | -             | -                   | 764                 |
| <i>Sarm1</i> <sup>AGS3</sup> | Δ62           | +111 to +172        | 38                  |
| <i>Sarm1</i> <sup>AGS3</sup> | Δ13           | +156 to +168        | 74                  |

215

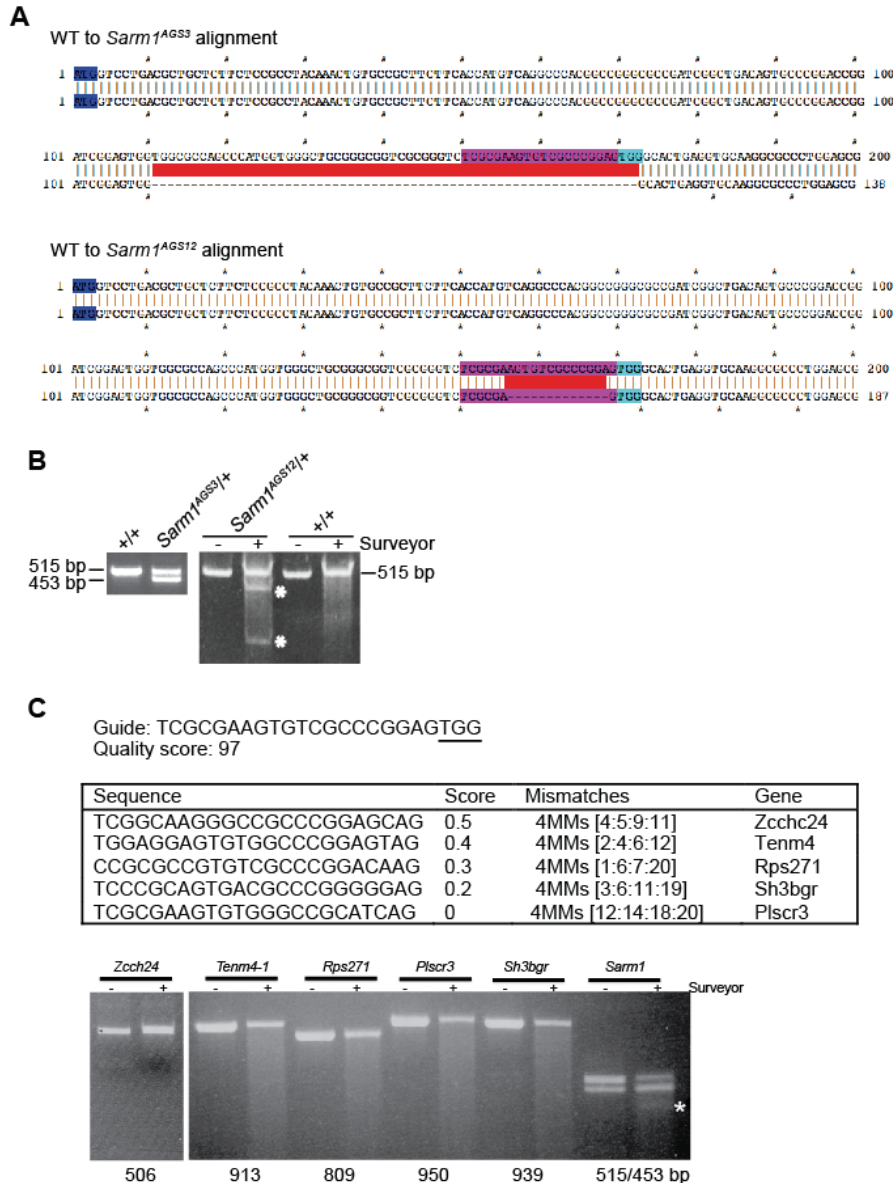

216  
217  
218  
219  
220  
221  
222  
223  
224  
225  
226  
227

**Figure S2. SARM1 CRISPR alleles and the absence of off-target CRISPR-mediated cleavage in *Sarm1*<sup>AGS3</sup> mice.** (A) Sequence alignment of WT and *Sarm1*<sup>AGS3</sup>, and WT and *Sarm1*<sup>AGS12</sup> alleles. The start codon is indicated in blue, the guide sequence in pink, and the PAM sequence in cyan. (B) WT or *Sarm1*<sup>AGS3</sup>/+ genomic DNA was amplified by PCR and run on an agarose gel (left). WT or *Sarm1*<sup>AGS12</sup>/+ genomic DNA was amplified by PCR, digested with Surveyor Nuclease, and run on a TBE gel (right). (C) Genes with off-target cleavage sites in exonic regions were amplified by PCR of genomic DNA from a cross of the *Sarm1*<sup>AGS3</sup> founder mouse to WT, digested with Surveyor Nuclease, and run on agarose gels. Sizes of PCR products are listed below the gel. The *Sarm1* locus served as a positive control for Surveyor cleavage. Note both the *Sarm1*<sup>AGS3</sup> and *Sarm1*<sup>AGS12</sup> alleles resulted from the same mosaic founder mouse.

228 The *Sarm1*<sup>AGS3</sup> and *Sarm1*<sup>AGS12</sup> lines were bred to homozygosity creating two new *Sarm1* knockout  
229 strains. We compared responses of macrophages derived from WT, the original *Sarm1*<sup>AD</sup> line, and the  
230 *Sarm1*<sup>AGS3</sup> line. As expected, the *Sarm1*<sup>AD</sup> macrophages showed defects in the production of *Ccl3*, *Ccl4*,  
231 and *Ccl5* mRNA in response to LPS (Fig 5A, top) or TNF- $\alpha$  (Fig 5A, bottom). However, the *Sarm1*<sup>AGS3</sup> line  
232 showed responses comparable to WT. The *Sarm1*<sup>AGS12</sup> line also showed *Ccl3*, *Ccl4*, and *Ccl5* responses  
233 comparable to WT in response to TNF- $\alpha$  (Fig 5B). This shows that defects in the production of



234 chemokines in the original *Sarm1<sup>AD</sup>* macrophages were due to background effects, and not SARM1  
 235 protein expression.

236

237 ***Sarm1* CRISPR knockout mice are protected from axonal degeneration**

238 We have been unable to detect the expression of a SARM1-specific band by western blot using a number  
 239 of commercial antibodies and western blotting conditions (not shown). We therefore sought to confirm  
 240 knockout of SARM1 protein expression functionally in an axonal degeneration assay. For this purpose,  
 241 we performed sciatic nerve transections of the right hindlimb in WT and *Sarm1<sup>AGS3</sup>* mice. 14 days  
 242 following transection, WT mice showed breakdown of the axon and myelin sheath, while *Sarm1<sup>AGS3</sup>* mice  
 243 showed remarkable protection (Fig 5C) as described previously in the *Sarm1<sup>AD</sup>* strain (2). This confirms a  
 244 role for SARM1 in axonal degeneration, and functional knockout of SARM1 in the *Sarm1<sup>AGS3</sup>* line.  
 245

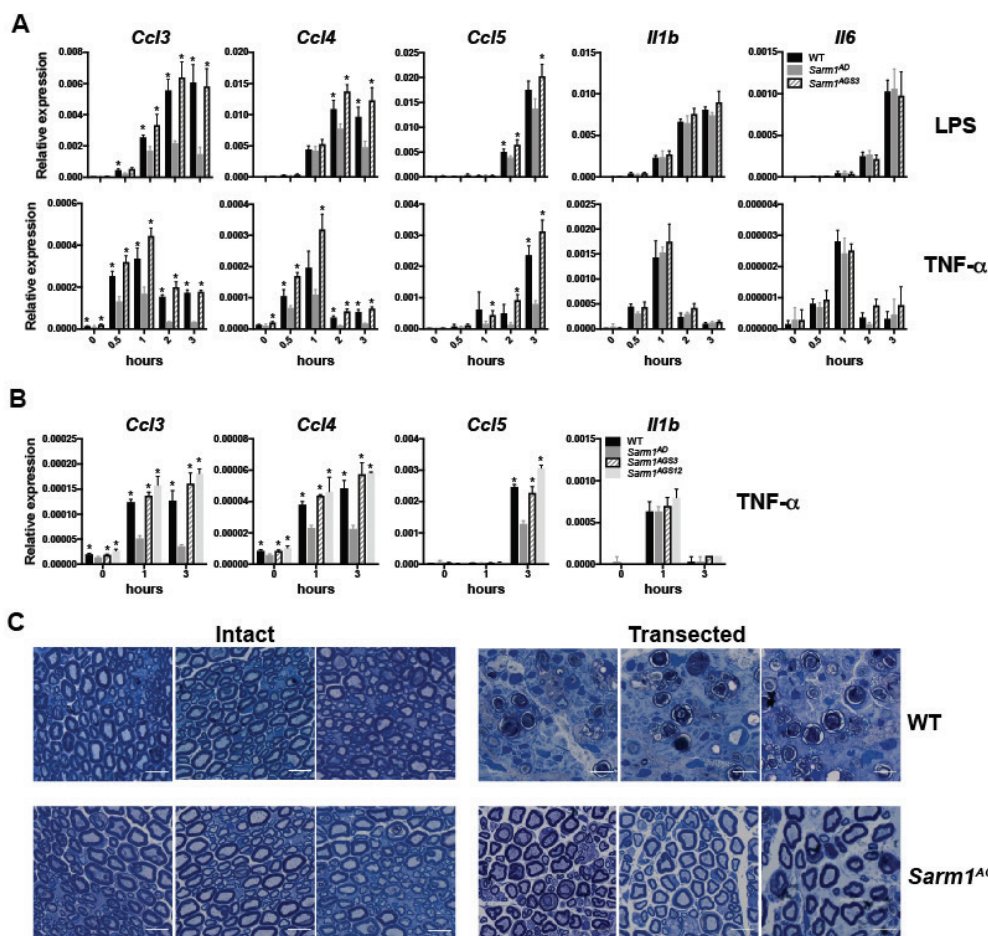

246 **FIGURE 5. *Sarm1* CRISPR knockout mice on a pure B6 background show normal chemokine production, but**  
 247 **are protected from axonal degeneration. (A)** WT, *Sarm1<sup>AD</sup>*, and *Sarm1<sup>AGS3</sup>* macrophages were stimulated with 10  
 248 ng/ml LPS and cytokine production was measured at the indicated time points by qPCR. **(B)** WT, *Sarm1<sup>AD</sup>*,  
 249 *Sarm1<sup>AGS3</sup>*, and *Sarm1<sup>AGS12</sup>* macrophages were stimulated with 10 ng/ml TNF- $\alpha$  as in A. **(C)** Toluidine Blue staining of  
 250 sciatic nerves from untransected (left) and transected (right) WT and *Sarm1<sup>AGS3</sup>* mice 14 days post-transection. Scale  
 251 bar 10 $\mu$ m. Graphs show mean $\pm$ SD of triplicate biological samples and are representative of 3 experiments. \*p<0.05  
 252 (unpaired t test).  
 253

254

255 ***Viral phenotypes of Sarm1* CRISPR mice**

256 We had previously reported that *Sarm1<sup>AD</sup>* mice are resistant to lethal encephalitic disease caused by VSV  
 257 infection (17). In order to determine if this was a true function of SARM1, we infected *Sarm1<sup>AGS3</sup>* and  
 258 *Sarm1<sup>AGS12</sup>* mice with VSV and monitored survival. As shown in Figure 6A, *Sarm1<sup>AD</sup>* mice, but not  
 259 *Sarm1<sup>AGS3</sup>* or *Sarm1<sup>AGS12</sup>* mice were protected from VSV, suggesting that SARM1 does not play a role in

260 VSV infection. Our reported defects in cytokine and chemokine production in the brain of VSV-infected  
 261 mice were also due to background effects and not SARM1 protein (Fig 6B). An independent line of  
 262 SARM1-deficient mice (referred to here as *Sarm1<sup>MSD</sup>*) was generated in the Diamond lab also on the 129  
 263 background but lacking the neomycin cassette. These mice showed increased susceptibility to WNV  
 264 infection (15). When *Sarm1<sup>AGS3</sup>* mice were infected with WNV, they were more susceptible than WT mice  
 265 (Fig 6C) confirming a role for SARM1 in WNV infection in agreement with the Diamond study.  
 266 Surprisingly, *Sarm1<sup>AD</sup>* mice showed similar susceptibility to WT mice to WNV infection (Fig 6C and Table  
 267 I), suggesting that background effects in *Sarm1<sup>AD</sup>* mice may have compensated for the impact of SARM1-  
 268 deficiency on susceptibility to WNV infection. *Sarm1<sup>MSD</sup>* mice were also reported to be protected from  
 269 LACV infection (16). When *Sarm1<sup>AD</sup>*, *Sarm1<sup>AGS3</sup>*, and *Sarm1<sup>AGS12</sup>* mice were infected with LACV, all  
 270 strains showed similar susceptibility to WT mice, suggesting that SARM1 also does not play a role in  
 271 susceptibility to LACV infection (Fig 6D).

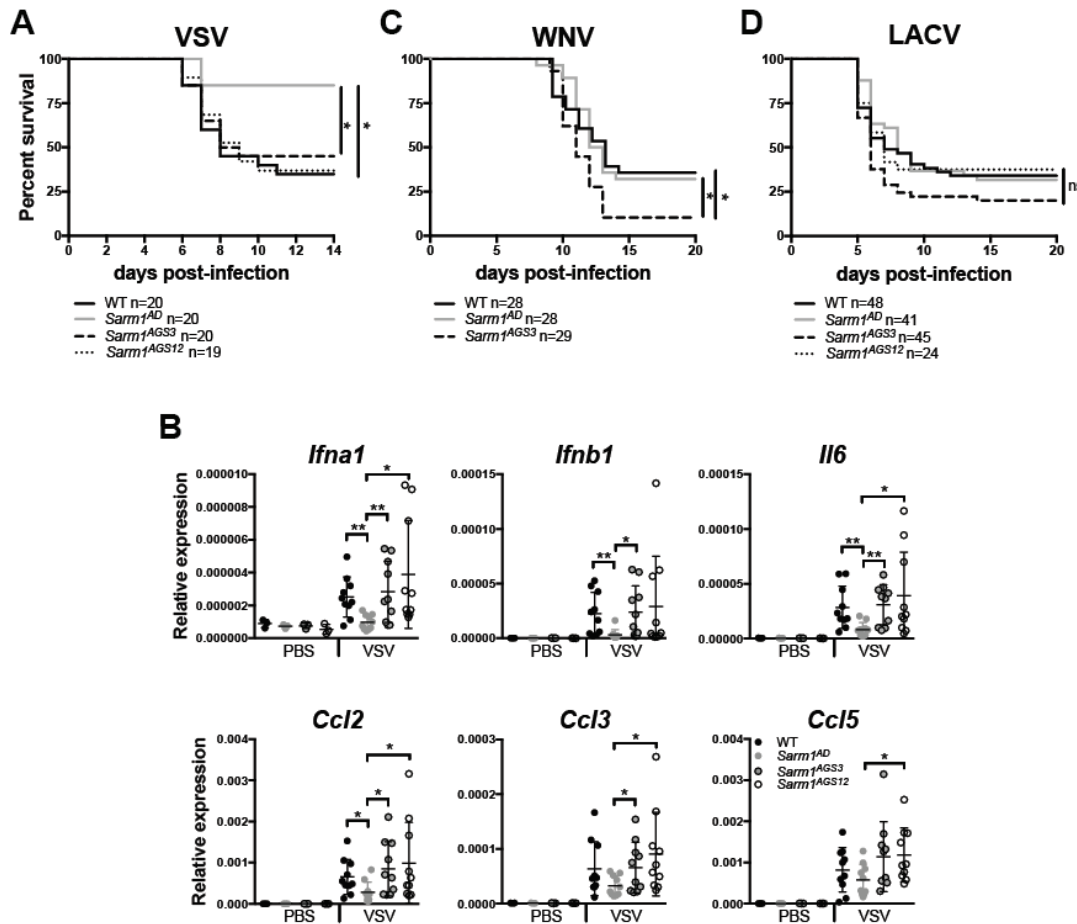

272  
 273  
 274 **FIGURE 6. Viral phenotypes of *Sarm1* CRISPR knockout mice.** (A) WT, *Sarm1<sup>AD</sup>*, *Sarm1<sup>AGS3</sup>*, and *Sarm1<sup>AGS12</sup>*  
 275 mice were infected intranasally with  $10^7$  pfu of VSV and survival was measured. (B) Mice were infected as in C, and  
 276 chemokine production in the brain was measured by qPCR at day 6 post-infection. (C) WT, *Sarm1<sup>AD</sup>*, and *Sarm1<sup>AGS3</sup>*  
 277 mice were infected with  $10^2$  FFU of WNV-NY99 via footpad injection and survival was measured. (D) WT, *Sarm1<sup>AD</sup>*,  
 278 and *Sarm1<sup>AGS3</sup>*, and *Sarm1<sup>AGS12</sup>* mice were infected intraperitoneally with  $10^3$  pfu of LACV original strain and survival  
 279 was measured. A, C, and D show combined results of 2 experiments with similar results, B shows mean $\pm$ SD for n=3  
 280 (PBS) and n=10 (VSV) and are representative of 3 experiments. \* $p < 0.05$  log-rank test (A, C, D) unpaired t test (B).  
 281

282 The *Sarm1<sup>AD</sup>* mice used in this study were backcrossed 10 times to the B6 background; *Sarm1<sup>MSD</sup>* were  
 283 reported to be backcrossed to the B6 background, however the extent of backcrossing was not reported.  
 284 In order to determine the precise backgrounds of the two strains, we performed a 384 panel SNP  
 285 analysis. The *Sarm1<sup>AD</sup>* mice were 99.5% B6, while the *Sarm1<sup>MSD</sup>* mice were 94.6% B6. The *Sarm1<sup>AD</sup>*

286 mice were found to differ from B6 at the expected location on chromosome 11 and one other region on  
 287 chromosome 10. The *Sarm1<sup>MSD</sup>* mice were found to differ from B6 at multiple locations including large  
 288 portions of chromosome 10 and 11 (Table S1), which may account for the different phenotypes observed  
 289 with the two strains. It should be noted that the precise genetic background of the strains used in different  
 290 labs and studies will likely differ depending on the extent of backcrossing done in individual labs.

291  
 292 Table S1. SNP analysis of *Sarm1<sup>AD</sup>* and *Sarm1<sup>MSD</sup>* mice

| SNP# | Chromosome | NCBI Assembly bp | B6J | <i>Sarm1<sup>AD</sup></i> | <i>Sarm1<sup>MSD</sup></i> |
|------|------------|------------------|-----|---------------------------|----------------------------|
| 11   | 01-11      | 75525463         | V V |                           | F F                        |
| 21   | 01-21      | 144953207        | F F |                           | V V                        |
| 115  | 05-15      | 104143745        | V V |                           | V F                        |
| 180  | 08-14      | 88318808         | F F |                           | V V                        |
| 205  | 10-01      | 7775347          | F F |                           | V F                        |
| 207  | 10-03      | 20325683         | F F |                           | V F                        |
| 209  | 10-05      | 38965551         | V V |                           | V F                        |
| 211  | 10-07      | 48685723         | F F |                           | V F                        |
| 213  | 10-09      | 67238174         | F F | V F                       | V V                        |
| 225  | 11-01      | 9552730          | F F |                           | V F                        |
| 229  | 11-05      | 37252460         | V V |                           | F F                        |
| 230  | 11-06      | 45819381         | F F |                           | V V                        |
| 231  | 11-07      | 54267162         | V V |                           | F F                        |
| 233  | 11-09      | 65095597         | V V |                           | F F                        |
| 235  | 11-11      | 75647055         | F F | V V                       | V V                        |
| 248  | 12-06      | 34055903         | F F |                           | V F                        |
| 260  | 12-18      | 114730692        | F F |                           | V F                        |
| 275  | 13-15      | 102573089        | F F |                           | V F                        |
| 277  | 13-17      | 115537300        | F F |                           | V F                        |
| 290  | 14-12      | 86216087         | V V |                           | V F                        |
| 292  | 14-14      | 101001947        | V V |                           | V F                        |
| 297  | 15-01      | 10575512         | F F |                           | V F                        |
| 299  | 15-03      | 22519205         | F F |                           | V F                        |
| 301  | 15-05      | 35126500         | F F |                           | V V                        |
| 329  | 17-03      | 23972821         | F F |                           | V F                        |
| 331  | 17-05      | 33380773         | F F |                           | V F                        |
| 349  | 18-09      | 58557879         | F F |                           | V F                        |
| 356  | 19-02      | 17770192         | F F |                           | V F                        |
| 362  | 19-08      | 59241076         | V V |                           | V F                        |

293 F=FAM probe

294 V=VIC probe

295

296 ***Xaf1* expression differences are due to sequence and isoform polymorphism between B6 and 129**

297 Significant differences in transcript levels of *Xaf1*, a proapoptotic protein, were reported by us in the  
 298 original *Sarm1<sup>AD</sup>* strain both in the presence and absence of VSV infection, and others (20) in the  
 299 *Sarm1<sup>MSD</sup>* strain both in the presence and absence of prion infection. Additionally, *Xaf1* was the most  
 300 highly upregulated transcript in SARM1-deficient mice compared to WT mice in both studies. Two curated  
 301 protein-coding transcripts for *Xaf1* have been described in mouse (Fig 7A), as well as a number of  
 302 predicted transcripts. Isoform 1 contains exons 1-6 and isoform 2 contains exons 1, 2, 5, and 6. The *Xaf1*  
 303 gene is also located in close proximity to the *Sarm1* gene on chromosome 11 (Fig 3A). Alignment of  
 304 RNAseq reads from the *Sarm1<sup>AD</sup>* strain to the B6 reference genome showed a number of nucleotide  
 305 differences (Fig 7B – indicated by colored lines), and the *Sarm1<sup>AD</sup>* consensus sequence matched the  
 306 reported sequence for 129. The nucleotide differences in exons 4 and 5 result in 4 amino acid  
 307 substitutions (Fig 7E). The 129 sequence has a gap in the alignment at the 3' end of exon 6, which is the  
 308 result of a 248 bp deletion, and a large peak in the 3' UTR that is not present in B6. The deletion spans  
 309 the B6 stop codon and 2 polyadenylation sites, which likely results in a transcript that terminates much  
 310 later in 129, potentially effecting transcript stability. The 129 transcript uses an alternative stop codon  
 311 located after the deletion, resulting in truncation of the last 3 amino acids at the C-terminus of the protein  
 312 (Fig 7E).

313 Sashimi plots visualizing splice junctions showed an increase in junctions between exon 2 and 5 (10% to  
314 48%) indicating less full length transcript in the *Sarm1<sup>AD</sup>* strain, as well as a large increase in a novel  
315 splice variant between exon 5 and 6 (4% to 30%) in the *Sarm1<sup>AD</sup>* strain (Fig 7C). Using RT-PCR primers  
316 directed against exon 1 and either the B6 or 129 exon 6, we detected the reported sequences for  
317 transcripts 1 and 2 in B6 (Fig 7D and see table III for sizes and accession numbers). In 129 we detected  
318 the reported sequence for transcript 1. The 3' end of the 129 transcript 2 was incomplete in databases,  
319 and ended in the same sequence as transcript 1, resulting in the same C-terminal truncation. In the 129  
320 samples we also detected two novel isoforms corresponding to the novel splice site between exon 5 and  
321 6, leading to a novel long isoform (600 bp) similar to transcript 1 but lacking part of exon 5, and a novel  
322 short isoform (315 bp) similar to transcript 2 but also lacking part of exon 5. We detected a band of similar  
323 size to the novel long isoform in B6 (Fig 7E – indicated by \*), however sequence analysis indicated this  
324 was a 626 bp transcript lacking exon 3 and leading to early truncation of the protein. The alternative  
325 splice site in exon 5 results in a large deletion of exon 5 (Fig 7E), but in-frame translation of exon 6.  
326 Importantly, the C-terminal domain is thought to be essential for binding to XIAP (31), and short isoforms  
327 are thought to function as dominant negative (22, 23), suggesting that these strain differences may lead  
328 to functional changes in XAF1.

329  
330

Table III. *Xaf1* Transcripts

| Transcript       | Size (bp) | Size (aa) | Size (kDa) | Accension                 |
|------------------|-----------|-----------|------------|---------------------------|
| B6 transcript 1  | 822       | 273       | 31         | ENSMUST00000146233.7      |
| 129 transcript 1 | 813       | 270       | 30         | MGP_129S1SvImJ_T0030476.1 |
| B6 transcript 2  | 537       | 178       | 20         | ENSMUST00000140842.8      |
| 129 transcript 2 | 528       | 175       | 20         | Submitted                 |
| 129 novel long   | 600       | 199       | 23         | Submitted                 |
| 129 novel short  | 315       | 104       | 12         | Submitted                 |

331

332 In order to test XAF1 antibodies, we generated XAF1-deficient 3T3 cell lines using CRISPR. Despite the  
333 presence of non-specific bands, using one of these antibodies we could detect XAF1 expression  
334 specifically in WT but not *Xaf1<sup>-/-</sup>* cells (Fig S3). This band was only present following IFN treatment, in  
335 agreement with *Xaf1* being an interferon-stimulated gene. Importantly, the antibody epitope is present in  
336 all isoforms. Following treatment of mice with i.v. PIC to induce IFN, we were unable to detect XAF1  
337 expression in the brain, but did observe expression in response to PIC treatment in the spleen. We  
338 observed a band corresponding to the size of the full-length protein in WT, *Sarm1<sup>AD</sup>*, and *Sarm1<sup>AGS3</sup>*  
339 mice. However, we also observed a unique band in the *Sarm1<sup>AD</sup>* strain following PIC treatment, which  
340 may represent either increased expression of isoform 2 or one of the novel isoforms (Fig 7F). No  
341 differences in *Xaf1* expression levels were observed between WT and *Sarm1<sup>AGS3</sup>* by RNAseq (Table IV),  
342 suggesting that SARM1 likely does not control XAF1 expression. Given the differential expression of  
343 XAF1 in the *Sarm1<sup>AD</sup>* strain, and its known role in cell death, we speculate that XAF1 may account for  
344 some of the phenotypes described in this strain.

345

#### 346 **RNAseq on *Sarm1* CRISPR mice**

347 In order to understand possible functions for SARM1 we performed RNAseq on brainstem isolated from  
348 WT and *Sarm1<sup>AGS3</sup>* mice infected with WNV or mock infected. In infected animals 9 transcripts were  
349 differentially regulated (Table IV). In mock infected animals 16 transcripts were differentially regulated, 4  
350 of which are involved in the mitochondrial electron transport chain – *Ndufa3* and *Ndufb3* (complex I),  
351 *Uqcrrh* (complex III), and *Atp5k* (complex V), as well as a number of small and large ribosomal proteins,  
352 and an apoptosis-associated tyrosine kinase (Table V and Fig 7D). In agreement with this data, a recent  
353 report suggests a role for SARM1 in mitochondrial respiration (8).

354

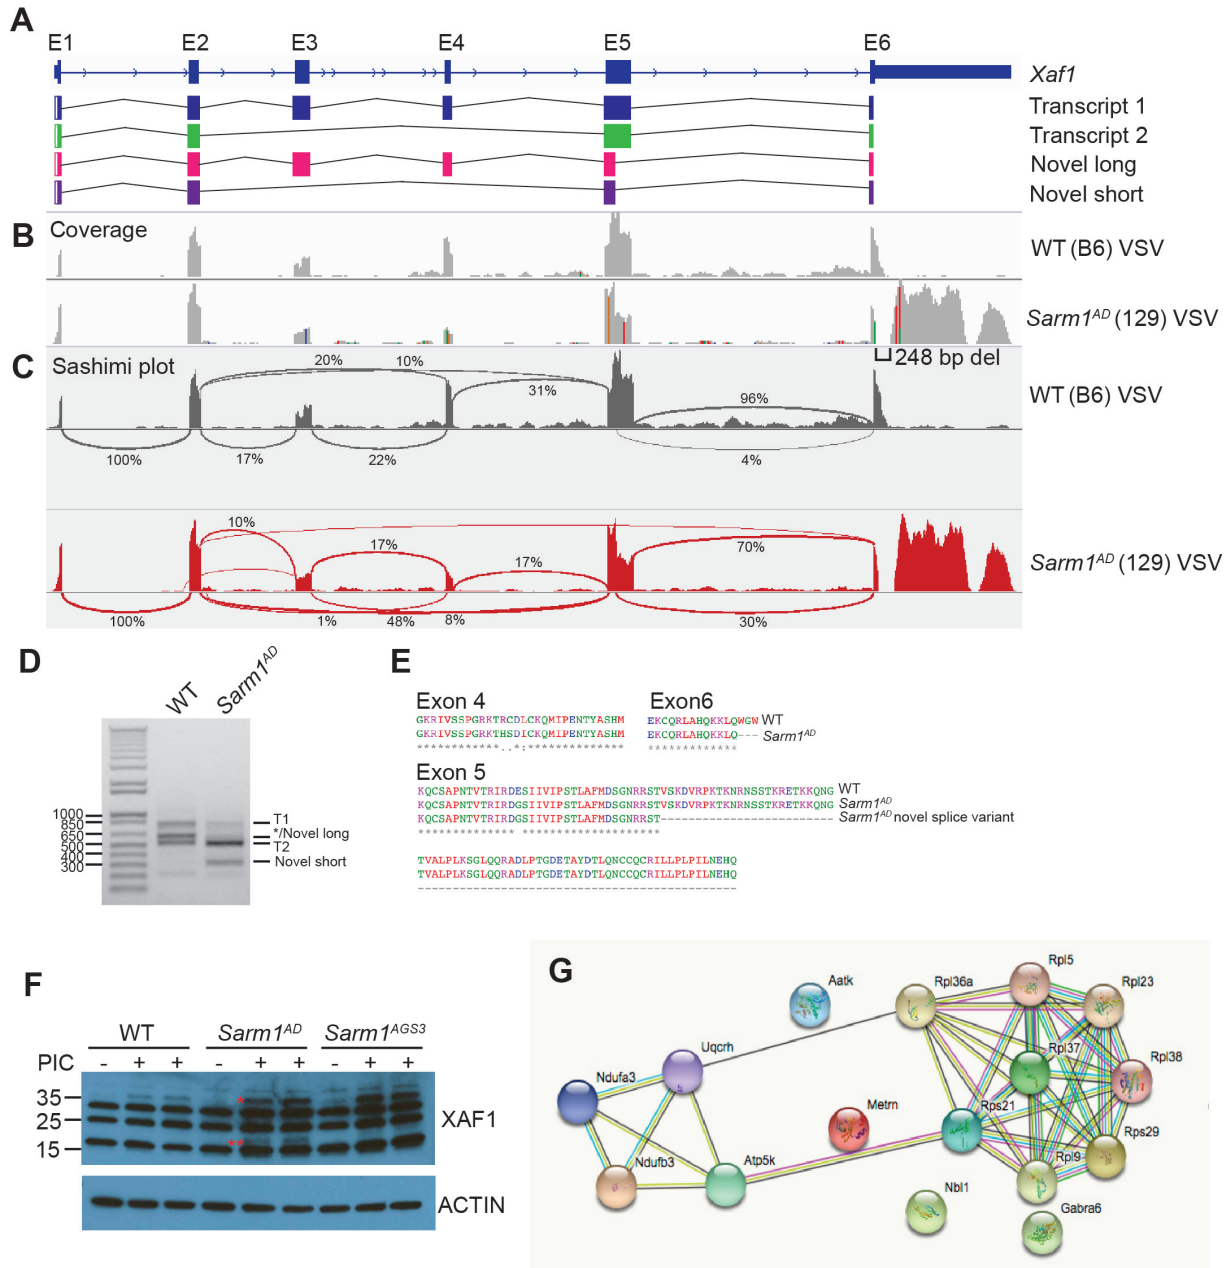

355  
 356  
 357 **FIGURE 7. *Xaf1* sequence and isoform polymorphism.** (A) *Xaf1* gene and transcripts. (B) WT and *Sarm1*<sup>AD</sup> mice  
 358 were infected with 10<sup>7</sup> pfu of VSV and brain samples were collected for RNAseq at day 5 post-infection. Plots show  
 359 coverage alignment of WT and *Sarm1*<sup>AD</sup> sample reads to the B6 reference genome (mm10) at the *Xaf1* locus – colors  
 360 indicate nucleotide changes from the reference sequence. (C) Sashimi plots (IGV) of the samples in B showing exon-  
 361 exon splice junctions. (D) RT-PCR of *Xaf1* transcripts from samples in B. \*Indicates that the ~600 bp band  
 362 corresponds to different transcripts in WT and *Sarm1*<sup>AD</sup> samples. (E) Protein coding differences between WT (B6)  
 363 and *Sarm1*<sup>AD</sup> (129) *Xaf1* transcripts. (F) WT, *Sarm1*<sup>AD</sup>, and *Sarm1*<sup>AGS3</sup> mice were injected i.v. with 100 ug of PIC, and  
 364 splenocytes were isolated at 24 hrs for XAF1 western blot. \*XAF1 isoform 1 \*\*Possible XAF1 novel isoform. (G)  
 365 STRING analysis of significantly differentially expressed genes from mock-infected brainstem of WT and *Sarm1*<sup>AGS3</sup>  
 366 mice. Lines indicate known and predicted interactions.  
 367  
 368

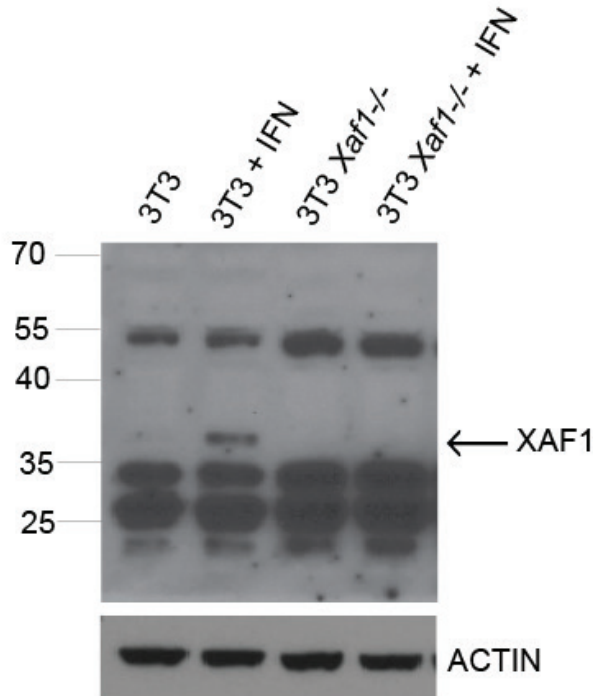

369  
370 **FIGURE S3. Specificity of XAF1 antibody.** 3T3 and 3T3 *Xaf1*<sup>-/-</sup> cells were mock treated, or treated with 1000 U of  
371 universal type I IFN for 24 hrs before western blotting for XAF1.  
372  
373

Table IV. Differentially expressed transcripts between WT and *Sarm1*<sup>AGS3</sup>

| Gene symbol          | Gene name                                              | Log2 Fold Change |
|----------------------|--------------------------------------------------------|------------------|
| <b>Mock infected</b> |                                                        |                  |
| Atp5k                | ATP synthase, subunit E (complex V)                    | 0.702            |
| Ndufa3               | NADH: ubiquinone oxioeductase, subunit A3 (complex I)  | 0.671            |
| Ndufb3               | NADH: ubiquinone oxioeductase, subunit B3 (complex I)  | 0.591            |
| Uqcrrh               | Cytochrome b-c1, subunit 6 (complex III)               | 0.365            |
| Rpl38                | Ribosomal protein L38                                  | 0.947            |
| Rps29                | Ribosomal protein S29                                  | 0.891            |
| Rpl36a               | Ribosomal protein L36a                                 | 0.633            |
| Rps21                | Ribosomal protein S21                                  | 0.624            |
| Rpl37                | Ribosomal protein L37                                  | 0.583            |
| Rpl23                | Ribosomal protein L23                                  | 0.551            |
| Rpl5                 | Ribosomal protein L5                                   | 0.339            |
| Rpl9                 | Ribosomal protein L9                                   | 0.316            |
| Aatk                 | Apoptosis-associated tyrosine kinase                   | -0.286           |
| Metrn                | Meteorin, glial cell differentiation regulator         | -0.351           |
| Nbl1                 | Neuroblastoma, suppression of tumorigenicity           | -0.494           |
| Gabra6               | GABA A receptor, subunit alpha 6                       | -1.27            |
| <b>WNV infected</b>  |                                                        |                  |
| Rps29                | Ribosomal protein S29                                  | 0.804            |
| Ifi27k2a             | Interferon-alpha inducible protein 27 like 2A          | 0.746            |
| Tfrc                 | Transferrin receptor                                   | -0.71            |
| Malat1               | Metastasis associated lung adenocarcinoma transcript 1 | -0.722           |
| Tug1                 | Taurine up-regulated (lncRNA)                          | -0.735           |
| Srxn1                | Sulfiredoxin 1                                         | -0.779           |
| Adcyap1              | Adenylate cyclase activating peptide 1                 | -0.865           |
| Fndc9                | Fibronecting type III domain containing 9              | -1.13            |
| Prl                  | Prolactin                                              | -1.38            |

374

## 375 Discussion

376 Current evidence supports a role for SARM1 in axonal degeneration (2, 3). Roles for SARM1 in immunity  
377 have also been reported for CNS viral infections (15-17), but not for pathogens that replicate outside of  
378 the CNS including *M.tuberculosis*, *L. monocytogenes*, or influenza virus infection (17). Whether SARM1  
379 plays a role outside of neural cells has proved difficult to answer. Studies on the expression and function  
380 of SARM1 have been hampered by the lack of reliable antibodies, making it difficult to gauge whether  
381 cells of the immune system express detectable protein levels. At the RNA level, evidence suggests  
382 predominant expression of SARM1 in the CNS. However, it remains possible that cells in the periphery  
383 express SARM1. We and others (15) did not detect the expression of SARM1 at the RNA level in  
384 macrophages, using primers that span exons 7 and 8, and detect high expression in WT but not *Sarm1<sup>AD</sup>*  
385 brain. However, others report expression of a shorter 724 a.a. isoform in T cells and macrophages using  
386 primers spanning exons 5-7 (18, 32). Our primers should detect both isoforms, so the reason for the  
387 discrepancy is unclear.

388  
389 In this study, we sought to address whether SARM1 plays a role in macrophages using cells from  
390 *Sarm1<sup>AD</sup>* mice. Similar to published reports (18) we found differences in the production of *Ccl5*, as well as  
391 *Ccl3* and *Ccl4* in *Sarm1<sup>AD</sup>* macrophages. However, a number of lines of evidence support that this is not  
392 due to SARM1 protein expression, but rather is due to background effects of the knockout strain. First,  
393 the defect in *Sarm1<sup>AD</sup>* macrophages is limited to 3 particular chemokine genes that are located in close  
394 physical proximity to each other and the modified locus. Second, the defect is evident in response to a  
395 wide array of stimuli that induce different signaling pathways. Third, we could find no defects in the  
396 signaling components that are shared between the induction pathways for these stimuli. Fourth, siRNA  
397 knockdown failed to reproduce the *Sarm1<sup>AD</sup>* chemokine phenotype suggesting a lack of dependence on  
398 SARM1 protein expression. Overexpression of SARM1 has been reported to modestly induce *Ccl5*  
399 expression (18), however we were unable to reproduce these findings. Additionally, we found differences  
400 in baseline expression of *Ccl3*, *Ccl4*, and *Ccl5* in unstimulated macrophages from *Sarm1<sup>AD</sup>* mice,  
401 supporting an intrinsic difference. Finally, generation of new knockout strains on a pure genetic  
402 background also failed to support a role for SARM1 in macrophage chemokine production. These data in  
403 combination with the lack of expression/low expression of SARM1 in macrophages fail to support a role  
404 for SARM1 as a TLR adaptor protein in myeloid cells.

405  
406 A variety of both protective and detrimental effects have been reported in different infection models in  
407 SARM1-deficient strains. These results are difficult to reconcile given the different construction of the  
408 knockout strains, and the significant variation in genetic background. Additionally, studies have not  
409 reported SNP analysis and whether or not additional backcrossing was done. SARM1 was reported to  
410 have a negative effect on susceptibility to both VSV and LACV infection, while it was reported to have a  
411 positive effect on susceptibility to WNV infection. We reported that *Sarm1<sup>AD</sup>* mice were less susceptible to  
412 VSV, and showed lower cytokine responses and infiltration in the brain, while Mukherjee et al reported  
413 that *Sarm1<sup>MSD</sup>* mice were protected from LACV infection, in a mechanism dependent on SARM1  
414 interaction with MAVS (16). Our CRISPR knockout strains did not support a role for SARM1 in mediating  
415 this effect in either infection model. Surprisingly, none of our knockout lines - including *Sarm1<sup>AD</sup>*,  
416 *Sarm1<sup>AGS3</sup>*, and *Sarm1<sup>AGS12</sup>* showed a protective effect during LACV infection, suggesting that the  
417 phenotype is specific to either the *Sarm1<sup>MSD</sup>* strain or the viral strain. We found the *Sarm1<sup>MSD</sup>* strain to  
418 differ from B6 at large portions of chromosome 10 and 11 in our analysis, which could account for the  
419 discrepant results. Additionally, the LACV original strain was used in our study, while Mukherjee et al  
420 used the LACV 1978 strain. These strains share 99% amino acid identity and are both highly virulent in  
421 young mice (33, 34), however differences in pathogenesis are observed in some strains (35). Our  
422 CRISPR knockout strains did, however support a role for SARM1 in mediating the positive effect during  
423 WNV infection. Surprisingly, the *Sarm1<sup>AD</sup>* line showed similar susceptibility to WT mice during WNV  
424 infection. Both the *Sarm1<sup>AD</sup>* and *Sarm1<sup>MSD</sup>* lines were made on the 129 background, however the  
425 *Sarm1<sup>AD</sup>* line retains neomycin. Similar phenotypes in *Sarm1<sup>AGS3</sup>*, *Sarm1<sup>AGS12</sup>*, and *Sarm1<sup>MSD</sup>* mice  
426 suggest that either neomycin effects on neighboring genes, or other 129 background effects account for  
427 the different phenotype of the *Sarm1<sup>AD</sup>* strain to WNV.

428  
429 Here we show background strain-dependent differences in the expression of the proapoptotic protein  
430 XAF1, which may represent a good candidate gene for the protective effect described in the knockout

431 strains, however a number of other possibilities are consistent with the data. The protective phenotype  
432 could be due to: 1) differences in chemokine levels due to the 129 congenic locus, which can also  
433 influence immune cell infiltration 2) transcriptional interference from neomycin effecting chemokines or  
434 other neighboring genes within the congenic interval 3) other mutations within the congenic interval or 4)  
435 other background effects. We had originally reported that *Sarm1<sup>AD</sup>* mice had lower levels of monocyte  
436 and macrophage infiltration into the brain, in agreement with their lower cytokine/chemokine levels, and  
437 postulated that this may lead to protection from immune-mediated tissue damage (17). Neomycin has  
438 been documented to abrogate downstream gene expression and interfere with locus control regions at  
439 both short and at megabase distances (36-38), which would also be consistent with lower recruitment of  
440 Pol II to the *Ccl5* promoter in *Sarm1<sup>AD</sup>* mice (18). In addition, the importance of genetic background on the  
441 phenotype of knockout mice is well known – and examples of interfering passenger mutations abound in  
442 the literature (39).

443  
444 This example and others highlight the advantages of generating new knockout strains using CRISPR  
445 technology. Given the difficulty in accessing the expression of SARM1 using available antibodies, we  
446 have used this approach along with a homology-directed repair template to generate mice with epitope-  
447 tagged SARM1. This line was unfortunately lost, however similar approaches will be important for  
448 assessing SARM1-interacting proteins and signaling pathways *in vivo*. RNAseq in our CRISPR strains  
449 suggests loss of SARM1 expression leads to changes in expression of ribosomal, and mitochondrial  
450 electron transport chain genes. This is in agreement with a recent study showing that SARM1  
451 phosphorylation regulates NAD<sup>+</sup> cleavage leading to inhibition of mitochondrial respiration (8). Overall the  
452 data suggest that reevaluation of phenotypes described in SARM1-deficient strains will be important for  
453 understanding the function of SARM1 in different contexts.

#### 454 455 **Acknowledgements**

456 This work was partially supported by R01AI108715 to JKL. The mice used for this study were produced  
457 by the Mouse Genetics and Gene Targeting Center of Research Excellence (CoRE), which is supported  
458 by the Icahn School of Medicine at Mount Sinai, and a Cancer Center Support Grant (1P30CA196521-01)  
459 from the National Cancer Institute/National Institutes of Health. We thank William Janssen at the  
460 Microscopy CoRE and Advanced Bioimaging Center for assistance with nerve imaging. We thank Michael  
461 Diamond and Andrew Pekosz for reagents, and Zuleyma Peralta and Maryline Panis for technical  
462 assistance.

463  
464



465 **References**

- 466 1. Kim, Y., P. Zhou, L. Qian, J. Z. Chuang, J. Lee, C. Li, C. Iadecola, C. Nathan, and A. Ding.  
467 2007. MyD88-5 links mitochondria, microtubules, and JNK3 in neurons and  
468 regulates neuronal survival. *J Exp Med* 204: 2063-2074.
- 469 2. Osterloh, J. M., J. Yang, T. M. Rooney, A. N. Fox, R. Adalbert, E. H. Powell, A. E.  
470 Sheehan, M. A. Avery, R. Hackett, M. A. Logan, J. M. MacDonald, J. S. Ziegenfuss, S.  
471 Milde, Y. J. Hou, C. Nathan, A. Ding, R. H. Brown, Jr., L. Conforti, M. Coleman, M.  
472 Tessier-Lavigne, S. Zuchner, and M. R. Freeman. 2012. dSarm/Sarm1 is required for  
473 activation of an injury-induced axon death pathway. *Science* 337: 481-484.
- 474 3. Gerdts, J., D. W. Summers, Y. Sasaki, A. DiAntonio, and J. Milbrandt. 2013. Sarm1-  
475 mediated axon degeneration requires both SAM and TIR interactions. *J Neurosci* 33:  
476 13569-13580.
- 477 4. Gerdts, J., D. W. Summers, J. Milbrandt, and A. DiAntonio. 2016. Axon Self-  
478 Destruction: New Links among SARM1, MAPKs, and NAD<sup>+</sup> Metabolism. *Neuron* 89:  
479 449-460.
- 480 5. Essuman, K., D. W. Summers, Y. Sasaki, X. Mao, A. DiAntonio, and J. Milbrandt. 2017.  
481 The SARM1 Toll/Interleukin-1 Receptor Domain Possesses Intrinsic NAD(+)   
482 Cleavage Activity that Promotes Pathological Axonal Degeneration. *Neuron* 93:  
483 1334-1343 e1335.
- 484 6. Horsefield, S., H. Burdett, X. Zhang, M. K. Manik, Y. Shi, J. Chen, T. Qi, J. Gilley, J. S. Lai,  
485 M. X. Rank, L. W. Casey, W. Gu, D. J. Ericsson, G. Foley, R. O. Hughes, T. Bosanac, M.  
486 von Itzstein, J. P. Rathjen, J. D. Nanson, M. Boden, I. B. Dry, S. J. Williams, B. J.  
487 Staskawicz, M. P. Coleman, T. Ve, P. N. Dodds, and B. Kobe. 2019. NAD(+) cleavage  
488 activity by animal and plant TIR domains in cell death pathways. *Science* 365: 793-  
489 799.
- 490 7. Wan, L., K. Essuman, R. G. Anderson, Y. Sasaki, F. Monteiro, E. H. Chung, E. Osborne  
491 Nishimura, A. DiAntonio, J. Milbrandt, J. L. Dangl, and M. T. Nishimura. 2019. TIR  
492 domains of plant immune receptors are NAD(+)-cleaving enzymes that promote cell  
493 death. *Science* 365: 799-803.
- 494 8. Murata, H., C. C. Khine, A. Nishikawa, K. I. Yamamoto, R. Kinoshita, and M. Sakaguchi.  
495 2018. c-Jun N-terminal kinase (JNK)-mediated phosphorylation of SARM1 regulates  
496 NAD(+) cleavage activity to inhibit mitochondrial respiration. *J Biol Chem* 293:  
497 18933-18943.
- 498 9. Akhouayri, I., C. Turc, J. Royet, and B. Charroux. 2011. Toll-8/Tollo negatively  
499 regulates antimicrobial response in the Drosophila respiratory epithelium. *PLoS*  
500 *Pathog* 7: e1002319.
- 501 10. Couillault, C., N. Pujol, J. Reboul, L. Sabatier, J. F. Guichou, Y. Kohara, and J. J. Ewbank.  
502 2004. TLR-independent control of innate immunity in Caenorhabditis elegans by the  
503 TIR domain adaptor protein TIR-1, an ortholog of human SARM. *Nat Immunol* 5:  
504 488-494.
- 505 11. Liberati, N. T., K. A. Fitzgerald, D. H. Kim, R. Feinbaum, D. T. Golenbock, and F. M.  
506 Ausubel. 2004. Requirement for a conserved Toll/interleukin-1 resistance domain  
507 protein in the Caenorhabditis elegans immune response. *Proc Natl Acad Sci U S A*  
508 101: 6593-6598.

- 509 12. Carty, M., R. Goodbody, M. Schroder, J. Stack, P. N. Moynagh, and A. G. Bowie. 2006.  
510 The human adaptor SARM negatively regulates adaptor protein TRIF-dependent  
511 Toll-like receptor signaling. *Nat Immunol* 7: 1074-1081.
- 512 13. Zhang, Q., C. M. Zmasek, X. Cai, and A. Godzik. 2011. TIR domain-containing adaptor  
513 SARM is a late addition to the ongoing microbe-host dialog. *Dev Comp Immunol* 35:  
514 461-468.
- 515 14. Malapati, H., S. M. Millen, and J. B. W. 2017. The axon degeneration gene SARM1 is  
516 evolutionarily distinct from other TIR domain-containing proteins. *Mol Genet*  
517 *Genomics*.
- 518 15. Szretter, K. J., M. A. Samuel, S. Gilfillan, A. Fuchs, M. Colonna, and M. S. Diamond.  
519 2009. The immune adaptor molecule SARM modulates tumor necrosis factor alpha  
520 production and microglia activation in the brainstem and restricts West Nile Virus  
521 pathogenesis. *J Virol* 83: 9329-9338.
- 522 16. Mukherjee, P., T. A. Woods, R. A. Moore, and K. E. Peterson. 2013. Activation of the  
523 Innate Signaling Molecule MAVS by Bunyavirus Infection Upregulates the Adaptor  
524 Protein SARM1, Leading to Neuronal Death. *Immunity* 38: 705-716.
- 525 17. Hou, Y. J., R. Banerjee, B. Thomas, C. Nathan, A. Garcia-Sastre, A. Ding, and M. B.  
526 Uccellini. 2013. SARM is required for neuronal injury and cytokine production in  
527 response to central nervous system viral infection. *J Immunol* 191: 875-883.
- 528 18. Gurtler, C., M. Carty, J. Kearney, S. A. Schattgen, A. Ding, K. A. Fitzgerald, and A. G.  
529 Bowie. 2014. SARM regulates CCL5 production in macrophages by promoting the  
530 recruitment of transcription factors and RNA polymerase II to the Ccl5 promoter. *J*  
531 *Immunol* 192: 4821-4832.
- 532 19. Carty, M., J. Kearney, K. A. Shanahan, E. Hams, R. Sugisawa, D. Connolly, C. G. Doran,  
533 N. Munoz-Wolf, C. Gurtler, K. A. Fitzgerald, E. C. Lavelle, P. G. Fallon, and A. G. Bowie.  
534 2019. Cell Survival and Cytokine Release after Inflammasome Activation Is  
535 Regulated by the Toll-IL-1R Protein SARM. *Immunity* 50: 1412-1424 e1416.
- 536 20. Zhu, C., B. Li, K. Frontzek, Y. Liu, and A. Aguzzi. 2019. SARM1 deficiency up-regulates  
537 XAF1, promotes neuronal apoptosis, and accelerates prion disease. *J Exp Med* 216:  
538 743-756.
- 539 21. Liston, P., W. G. Fong, N. L. Kelly, S. Toji, T. Miyazaki, D. Conte, K. Tamai, C. G. Craig,  
540 M. W. McBurney, and R. G. Korneluk. 2001. Identification of XAF1 as an antagonist of  
541 XIAP anti-Caspase activity. *Nat Cell Biol* 3: 128-133.
- 542 22. Lee, M. G., J. Han, S. I. Jeong, N. G. Her, J. H. Lee, T. K. Ha, M. J. Kang, B. K. Ryu, and S. G.  
543 Chi. 2014. XAF1 directs apoptotic switch of p53 signaling through activation of  
544 HIPK2 and ZNF313. *Proc Natl Acad Sci U S A* 111: 15532-15537.
- 545 23. Jeong, S. I., J. W. Kim, K. P. Ko, B. K. Ryu, M. G. Lee, H. J. Kim, and S. G. Chi. 2018. XAF1  
546 forms a positive feedback loop with IRF-1 to drive apoptotic stress response and  
547 suppress tumorigenesis. *Cell Death Dis* 9: 806.
- 548 24. Hayden, M. S., and S. Ghosh. 2014. Regulation of NF-kappaB by TNF family cytokines.  
549 *Semin Immunol* 26: 253-266.
- 550 25. Brubaker, S. W., K. S. Bonham, I. Zanoni, and J. C. Kagan. 2015. Innate immune  
551 pattern recognition: a cell biological perspective. *Annu Rev Immunol* 33: 257-290.
- 552 26. Laird, M. H., S. H. Rhee, D. J. Perkins, A. E. Medvedev, W. Piao, M. J. Fenton, and S. N.  
553 Vogel. 2009. TLR4/MyD88/PI3K interactions regulate TLR4 signaling. *J Leukoc Biol*  
554 85: 966-977.

- 555 27. Chiang, C. Y., V. Veckman, K. Limmer, and M. David. 2012. Phospholipase Cgamma-2  
556 and intracellular calcium are required for lipopolysaccharide-induced Toll-like  
557 receptor 4 (TLR4) endocytosis and interferon regulatory factor 3 (IRF3) activation. *J*  
558 *Biol Chem* 287: 3704-3709.
- 559 28. Laboratory, T. J. 2017. Mouse Facts.
- 560 29. Ran, F. A., P. D. Hsu, J. Wright, V. Agarwala, D. A. Scott, and F. Zhang. 2013. Genome  
561 engineering using the CRISPR-Cas9 system. *Nat Protoc* 8: 2281-2308.
- 562 30. Cho, S. W., S. Kim, Y. Kim, J. Kweon, H. S. Kim, S. Bae, and J. S. Kim. 2014. Analysis of  
563 off-target effects of CRISPR/Cas-derived RNA-guided endonucleases and nickases.  
564 *Genome Res* 24: 132-141.
- 565 31. Tse, M. K., C. K. Cho, W. F. Wong, B. Zou, S. K. Hui, B. C. Wong, and K. H. Sze. 2012.  
566 Domain organization of XAF1 and the identification and characterization of  
567 XIAP(RING) -binding domain of XAF1. *Protein Sci* 21: 1418-1428.
- 568 32. Panneerselvam, P., L. P. Singh, V. Selvarajan, W. J. Chng, S. B. Ng, N. S. Tan, B. Ho, J.  
569 Chen, and J. L. Ding. 2013. T-cell death following immune activation is mediated by  
570 mitochondria-localized SARM. *Cell Death Differ* 20: 478-489.
- 571 33. Bennett, R. S., D. R. Ton, C. T. Hanson, B. R. Murphy, and S. S. Whitehead. 2007.  
572 Genome sequence analysis of La Crosse virus and in vitro and in vivo phenotypes.  
573 *Virol J* 4: 41.
- 574 34. Huang, C., W. H. Thompson, N. Karabatsos, L. Grady, and W. P. Campbell. 1997.  
575 Evidence that fatal human infections with La Crosse virus may be associated with a  
576 narrow range of genotypes. *Virus Res* 48: 143-148.
- 577 35. Gonzalez-Scarano, F., B. Beaty, D. Sundin, R. Janssen, M. J. Endres, and N. Nathanson.  
578 1988. Genetic determinants of the virulence and infectivity of La Crosse virus.  
579 *Microb Pathog* 4: 1-7.
- 580 36. Olson, E. N., H. H. Arnold, P. W. Rigby, and B. J. Wold. 1996. Know your neighbors:  
581 three phenotypes in null mutants of the myogenic bHLH gene MRF4. *Cell* 85: 1-4.
- 582 37. Pham, C. T., D. M. MacIvor, B. A. Hug, J. W. Heusel, and T. J. Ley. 1996. Long-range  
583 disruption of gene expression by a selectable marker cassette. *Proc Natl Acad Sci U S*  
584 *A* 93: 13090-13095.
- 585 38. Meier, I. D., C. Bernreuther, T. Tilling, J. Neidhardt, Y. W. Wong, C. Schulze, T.  
586 Streichert, and M. Schachner. 2010. Short DNA sequences inserted for gene targeting  
587 can accidentally interfere with off-target gene expression. *FASEB J* 24: 1714-1724.
- 588 39. Vanden Berghe, T., P. Hulpiau, L. Martens, R. E. Vandenbroucke, E. Van Wonterghem,  
589 S. W. Perry, I. Bruggeman, T. Divert, S. M. Choi, M. Vuylsteke, V. I. Shestopalov, C.  
590 Libert, and P. Vandenabeele. 2015. Passenger Mutations Confound Interpretation of  
591 All Genetically Modified Congenic Mice. *Immunity* 43: 200-209.
- 592 40. Park, M. S., M. L. Shaw, J. Munoz-Jordan, J. F. Cros, T. Nakaya, N. Bouvier, P. Palese, A.  
593 Garcia-Sastre, and C. F. Basler. 2003. Newcastle disease virus (NDV)-based assay  
594 demonstrates interferon-antagonist activity for the NDV V protein and the Nipah  
595 virus V, W, and C proteins. *J Virol* 77: 1501-1511.
- 596 41. Dobin, A., C. A. Davis, F. Schlesinger, J. Drenkow, C. Zaleski, S. Jha, P. Batut, M.  
597 Chaisson, and T. R. Gingeras. 2013. STAR: ultrafast universal RNA-seq aligner.  
598 *Bioinformatics* 29: 15-21.
- 599 42. Szklarczyk, D., J. H. Morris, H. Cook, M. Kuhn, S. Wyder, M. Simonovic, A. Santos, N. T.  
600 Doncheva, A. Roth, P. Bork, L. J. Jensen, and C. von Mering. 2017. The STRING

601 database in 2017: quality-controlled protein-protein association networks, made  
602 broadly accessible. *Nucleic Acids Res* 45: D362-D368.

603

604

## 605 **Materials and Methods**

### 606 *Mice*

607 *Sarm1<sup>AD</sup>* mice on the C57BL/6J background were generated previously from 129 ES cells (1) and  
608 backcrossed to C57BL/6J 10 generations. Mice were compared to WT C57BL/6J mice purchased from  
609 Jackson. Animal studies were approved by the Institutional Animal Care and Use Committee of Icahn  
610 School of Medicine at Mount Sinai. CRISPR knockout mice were generated using the CRISPR design  
611 tool to select the guide sequence TCGCGAAGTGTCGCCCGGAGTGG in exon 1 of the *Sarm1* gene. This  
612 was cloned into pSpCas9(BB)-2A-GFP (Addgene) as described (29). The resulting plasmid was injected  
613 at 1 ng/ul into the male pronuclei of one-cell stage C57BL/6J mouse embryos. After injection, the  
614 embryos were returned to the oviducts of pseudopregnant Swiss-Webster (SW) females that had been  
615 mated the day before with vasectomized SW males. Resulting pups were characterized using a  
616 combination of PCR, sequencing, and surveyor analysis. *Sarm1<sup>AGS3</sup>* were genotyped by PCR using the  
617 primers listed in table I and the PCR conditions 95° 30 sec, 53° 30 sec, 72° 1 min. *Sarm1<sup>AGS12</sup>* were  
618 genotyped by PCR using the primers listed in table I and cycling conditions 95° 30 sec, 63.5° 30 sec, 72°  
619 1 min, and sequencing using the forward primer. Surveyor assay was performed using *Sarm1<sup>AG3S</sup>* PCR  
620 conditions and Surveyor Mutation Detection Kit (IDT) followed by electrophoresis on Novex 20% TBE  
621 gels (Invitrogen). Off-target CRISPR cleavage was accessed by PCR amplification using the primers  
622 listed in table I and cycling conditions 95° 30 sec, 60° 30 sec, 72° 1 min and the Surveyor Mutation  
623 Detection Kit (IDT) on a pup from a cross of the *Sarm1<sup>AGS3</sup>* founder mouse to WT.

624

### 625 *SNP analysis*

626 To determine the precise genetic background of *Sarm1<sup>AD</sup>* and *Sarm1<sup>MSD</sup>* mice, 384 SNP panel analysis  
627 was performed by Charles River Genetic Testing Services. Testing was performed on tail DNA from  
628 *Sarm1<sup>AD</sup>* mice maintained in our colony and MEF DNA derived from the *Sarm1<sup>MSD</sup>* line (provided by  
629 Michael Diamond) because the Diamond lab no longer maintains the animal colony. *Ccl5* SNPs were  
630 genotyped by PCR of genomic DNA from C57BL/6J or *Sarm1<sup>AD</sup>* mice using primers listed in table I and  
631 cycling conditions 95° 30 sec, 60° 30 sec, 72° 1 min, followed by cloning into pGEM-T (Promega) and  
632 sequencing.

633

### 634 *Macrophages and 3T3 cell lines*

635 Bone marrow was obtained from femurs and tibias of mice, RBCs were lysed and cells were cultured for 7  
636 days in RPMI 1640 (Gibco) containing 10% FBS (Hyclone), Penicillin, Streptomycin, L-glutamine, Hepes  
637 (Cellgro),  $\beta$ -ME, and 10 ng/ml rmM-CSF (R&D Systems). Macrophages were removed from the plate  
638 following incubation with cold PBS and plated in 24-well plates at  $0.25 \times 10^6$ /well. Cells were stimulated the  
639 following day with Poly(I:C) HMW (Invivogen), *E. coli* 0111:B4 LPS purified by gel filtration (Sigma), R848  
640 (Invivogen), CL075 (Invivogen), NDV-GFP (40), or VSV Indiana strain at concentrations listed in figure  
641 legends. 3T3 *Xaf1<sup>-/-</sup>* cells were generated by cloning the guide sequences  
642 AGCTTCCTGCAGTGCTTCTGTGG and AGGCTGACTTCCAAGTGTGCAGG located in exon 1 of *Xaf1*  
643 into pSpCas9n(BB)-2A-GFP, and transfecting into 3T3 cells using LTX (Invitrogen). Single cell clones  
644 were obtained by limiting dilution and screened by PCR using the primers listed in table I and the PCR  
645 conditions 95° 30 sec, 60.2° 30 sec, 72° 30 sec, Surveyor assay (as above), and western blot.

646

### 647 *qRT-PCR*

648 Total RNA was extracted from macrophage cultures using EZNA total RNA kit and RNase-free DNase  
649 (Omega). RNA was reverse-transcribed using Maxima Reverse Transcriptase and oligo-dT (Thermo).  
650 Quantitative RT-PCR was performed on cDNA using LightCycler 480 SYBR Green I Master Mix (Roche)  
651 and the primers listed in table I on a LightCycler 480 II. Data is shown as relative expression ( $2^{-\Delta\Delta Ct}$   
652 relative to 18S).

653

### 654 *ELISAs*

655 CCL3 ELISA was performed using the mouse CCL3/MIP-1 $\alpha$  DuoSet (R&D Systems), TNF- $\alpha$  ELISA was  
656 performed using the mouse TNF ELISA kit (BD OptEIA), and IFN- $\alpha$  ELISA was performed using the  
657 Verikine Mouse IFN Alpha ELISA Kit (PBL Assay Science) according to the manufacturer's instructions.

658

### 659 *Western blots*

660 For macrophage blots,  $0.5 \times 10^6$  macrophages were plated in 12-well plates. The following day cells were  
661 serum starved for 3 hrs, stimulated with 10 ng/ml LPS or TNF- $\alpha$  for the indicated amount of time, lysed in  
662 RIPA buffer containing Halt Protease and Phosphatase Inhibitor Cocktail (Thermo), denatured in Laemmli  
663 buffer, run on 4-12% Bis-Tris gels (Invitrogen), and transferred to PVDF membranes. For Xaf1 blots  $8 \times 10^3$   
664 3T3 cells were treated for 24 hrs with 2000 U universal type I IFN (PBL) and lysed in Laemmli buffer. Mice  
665 were injected with 100  $\mu$ g of HMW Poly(I:C) in 200  $\mu$ l of PBS, spleens were harvested at 24 hrs. and  
666 homogenized in RIPA containing cOmplete Protease Inhibitor Cocktail (Roche), denatured in Laemmli  
667 buffer, run on 4-12% Mini-Protean gels (BioRad), and rapid transferred to PVDF membranes. Membranes  
668 were blocked with 0.2% I-BLOCK (Applied Biosystems) 0.1% Tween-20 in TBS and probed with rabbit  
669 I $\kappa$ B $\alpha$  (Cell Signaling 9242), rabbit phosphor-SAPK/JNK (Thr183/Tyr185) (Cell Signaling 9251), rabbit  
670 phosphor-p44/42 MAPK (Erk1/2) (Thr202/Tyr204) (Cell Signaling 4370), rabbit phosphor-p38 MAPK  
671 (Thr180/Tyr182) (Cell Signaling 9211), and mouse phosphor-Akt (Ser 473) (587F11) (Cell Signaling  
672 4051), and rabbit Xaf1 (aa166-194, LS Bio LS-C158287), followed by detection with ECL donkey anti-  
673 rabbit IgG HRP or ECL sheep anti-mouse IgG HRP (GE Healthcare), or directly detected with rabbit  $\beta$ -  
674 Actin HRP (Cell Signaling 5125), or mouse V5-HRP (Serotec).

#### 675 676 *Ca<sup>2+</sup> signaling*

677 Macrophages were plated at  $0.75 \times 10^5$ /well in 96-well black clear-bottom plates overnight. Cells were  
678 loaded with 10  $\mu$ M Fura-2-AM in 0.1% BSA in Hanks buffer for 30 min, washed, and fluorescence was  
679 measured (330 nm  $\rightarrow$  513 nm – 380 nm  $\rightarrow$  513) on a plate reader after addition of 1 mM ATP or 0.1  $\mu$ g/ml  
680 LPS.

#### 681 682 *RAW-SARM1-V5 cells and siRNA*

683 Full length *Sarm1* with a C-terminal V5 tag or the V5 tag alone was cloned into the pLVX-IRES-Puro  
684 lentiviral vector (Clontech) and transfected into 293T cells along with gag/pol and VSV-G expression  
685 plasmids to generate lentiviral particles. These were used to infect RAW 264.7 cells, followed by  
686 puromycin selection. Expression was checked by western blot and immunofluorescence. SARM1 was  
687 knocked down using Dharmacon Accell siRNA targeting *Sarm1* (target sequences:  
688 UGCUGUUGCUCGAUUCGUC and CCAAGGUGUUCAGCGACAU).  $0.3 \times 10^5$  RAW-V5 or RAW-SARM1-  
689 V5 cells were plated in 96-well plates, the following day siRNA was added at 1  $\mu$ M in Accell delivery  
690 media for 72 hrs, Accell delivery media was removed and DMEM containing 10% FBS was added for 3  
691 hrs. Cells were stimulated with 10 ng/ml LPS for 3 hrs and qPCR was performed as above. Knockdown in  
692 primary macrophages was performed similarly on  $0.5 \times 10^5$  cells.

#### 693 694 *VSV, LACV, and WNV infection*

695 6-8-week old female mice were anesthetized with ketamine/xylazine and infected intranasally with  $10^7$  pfu  
696 of VSV Indiana strain in 20  $\mu$ l PBS. Mice were monitored daily for weight and sacrificed when exhibiting  
697 severe paralysis or more than 25% weight loss. For brain cytokines, mice were perfused with PBS and  
698 brains were removed and stored in RNAlater, followed by homogenization and RNA isolation with EZNA  
699 HP Total RNA kit (Omega), and qPCR as above. In BSL3 containment, 8-week old female mice were  
700 anesthetized with isoflurane and injected subcutaneously in the neck with  $10^2$  FFU of West Nile virus-  
701 NY99 in 50  $\mu$ l of PBS and monitored as for VSV. 3-week old male and female mice were infected  
702 intraperitoneally with  $10^3$  pfu of LACV original (parent) strain (kindly provided by Andrew Pekosz) and  
703 sacrificed when exhibiting severe paralysis.

#### 704 705 *RNAseq*

706 WT and *Sarm1<sup>AD</sup>* mice were infected intranasally with  $10^7$  pfu of VSV and brain RNA was prepared as  
707 above at day 5 post-infection. RNA quality and quantity was assessed using the Agilent Bioanalyzer  
708 and Qubit RNA Broad Range Assay kit (Thermo Fisher), respectively. Barcoded directional RNA-  
709 Sequencing libraries were prepared using the TruSeq Stranded Total RNA Sample Preparation kit  
710 (Illumina). Libraries were pooled and sequenced on the Illumina HiSeq platform in a 100 bp single-end  
711 read run format. After adapter removal with cutadapt (<https://doi.org/10.14806/ej.17.1.200>) and base  
712 quality trimming to remove 3' read sequences if more than 20 bases with Q $\geq$ 20 were present, paired-end  
713 reads were mapped to the murine mm10 reference genome using STAR (v2.5.3a) (41) and reference  
714 gene annotations from ENSEMBL (v75). WT and *Sarm1<sup>AGS3</sup>* mice were infected intracranially with 100  
715 FFU of WNV-Kunjinn strain in 30  $\mu$ l PBS or mock infected with PBS. Animals were perfused with PBS at

716 day 5 post-infection. RNA preparation and sequencing was performed as above except that sequencing  
 717 was non-directional and used a NextSeq machine with 150 bp reads. Protein-protein association  
 718 networks were determined using STRING database (42). RNAseq datasets have been deposited in GEO  
 719 under the record numbers GSE136221 and GSE136284, and *Xaf1* transcripts have been deposited in  
 720 Genbank under the accession number (submitted).

721  
 722 *Sciatic nerve transections*  
 723 WT and *Sarm1*<sup>AGS3</sup> were anesthetized with ketamine/xylazine, fur was shaved, and skin was cleaned. An  
 724 incision was made in the skin and the muscle was separated to expose the sciatic nerve. A 1 mm portion  
 725 of the nerve was excised, and the skin was closed with staples. Antibiotic ointment was applied to the  
 726 incision and 0.05 mg/kg buprenorphine was administered immediately and at 6 hrs for pain. Mice were  
 727 housed for 14 days, and euthanized with 15% aqueous chloral hydrate, followed by perfusion with 1%  
 728 Paraformaldehyde/PBS, pH 7.2 at a flow rate of 7.5 ml/min, and immediately with 2% paraformaldehyde  
 729 and 2% glutaraldehyde/PBS, pH 7.2 at the same flow rate for an additional 10 minutes. Skin was  
 730 removed, and the carcass placed in immersion fixation (same as above) to be post-fixed for a minimum of  
 731 one week at 4 degrees C. The transected and non-transected nerves were removed and  
 732 flat mold embedded to ensure cross-sectional orientation in EPON resin. Polymerized blocks were  
 733 sectioned on a Leica UC7 Ultramicrotome using a histoknife at 0.5  $\mu$ m, counterstained with 1% Toluidine  
 734 Blue and coverslipped. Brightfield images were acquired with an Axioimager Z2M microscope (Zeiss) with  
 735 an EC Plan-Neofluar 40x/1.3 oil objective, and processed with Fiji software (NIH).

736  
 737 Table V. Primer sequences

|                                          | Forward primer             | Reverse primer                  |
|------------------------------------------|----------------------------|---------------------------------|
| <i>Sarm1</i> <sup>AGS3</sup> genotyping  | TCTCCGCCTACAACTGTGC        | GGATACCGTCTCCAACCACC            |
| <i>Sarm1</i> <sup>AGS12</sup> genotyping | GTCCTGACGCTGCTCTTCT        | TGTGACAGCCTGTTTTGCTC            |
| 18S qRT-PCR                              | GTAACCCGTTGAACCCCAT        | CCATCCAATCGGTAGTAGCG            |
| <i>Ccl1</i> qRT-PCR                      | CCCCTGAAGTTTATCCAGTGTTACAG | GTTGAGGCGCAGCTTTCTCTAC          |
| <i>Ccl2</i> qRT-PCR                      | TTGACCCGTAATCTGAAGCTAAT    | TCACAGTCCGAGTCACACTAGTTTAC      |
| <i>Ccl3</i> qRT-PCR                      | TGCCCTTGCTGTTCTTCTCT       | GTGGAATCTTCCGGCTGTAG            |
| <i>Ccl4</i> qRT-PCR                      | AAGCTGCCGGGAGGTGTAAG       | TGCTGCCCCTCTCTCTCTCTT           |
| <i>Ccl5</i> qRT-PCR                      | TGCCACGTCAAGGAGTATTTT      | TCCTAGCTCATCCAAATAGTTGATG       |
| <i>Ccl7</i> qRT-PCR                      | GGATCTCTGCCACGCTTCTG       | TCCTTCTGTAGCTCTTGAGATTCCTC      |
| <i>Cxcl2</i> qRT-PCR                     | GTCCCTCAACGGAAGAACCAA      | ACTCTCAGACAGCGAGGCACAT          |
| <i>Cxcl3</i> qRT-PCR                     | CTGGGATTCACCTCAAGAATC      | CAGGGTCAAGGCAAGCCTC             |
| <i>Cxcl9</i> qRT-PCR                     | ATTGTGTCTCAGAGATGGTGTAATG  | TGAAATCCCATGGTCTCGAAAG          |
| <i>Cxcl10</i> qRT-PCR                    | TTCACCATGTGCCATGCC         | GAAGTACGAGCCTGAGCTAGG           |
| <i>Cxcl11</i> qRT-PCR                    | AAAATGGCAGAGATCGAGAAAGC    | CAGGCACCTTTGTCTGTTTATGAG        |
| <i>Il1b</i> qRT-PCR                      | TGTCTTGGCCGAGGACTAAGG      | TGGGCTGGACTGTTTCTAATGC          |
| <i>Il6</i> qRT-PCR                       | TGAGATCTACTCGCAAACCTAGTG   | CTTCGTAGAGAACAACATAAAGTCAGATACC |
| <i>Il10</i> qRT-PCR                      | GGGTTGCCAAGCCTTATCG        | TCTCACCCAGGGAATCAAATG           |
| <i>Il12b</i> qRT-PCR                     | CCTAAGTTCATCATGACACCTTTGC  | CCAAGTGAATGCTAGAATATCTATGC      |
| <i>Tnf</i> qRT-PCR                       | AGAAACACAAGATGCTGGGACAGT   | CCTTTGCAGAACTCAGGAATGG          |
| <i>Ifng</i> qRT-PCR                      | TGCTGATGGGAGGAGATGTCTAC    | TTCTTTTCAGGGACAGCCTGTTAC        |
| <i>Ifnb1</i> qRT-PCR                     | TGTCTTGGCCGAGGACTAAGG      | TGGGCTGGACTGTTTCTAATGC          |
| <i>Sarm1</i> qRT-PCR                     | TCGCAATTTTGTCTCTGGTG       | AGCTTAAAGCAGTCACAATCTCC         |
| <i>Zcch24</i> Surveyor                   | GCTGTCTGCCATCGACACGA       | CTGCTTACTAGGAGCAGGGCT           |
| <i>Tenm4-1</i> Surveyor                  | ATAAGCCTGGGGCCTAGTGA       | TACTGCAGCGGTTACCAAGG            |
| <i>Rps271</i> Surveyor                   | TATTGTTCCGTGTGTCCCCC       | GAACCCCTTTGTCTGTTTGGC           |
| <i>Plscr3</i> Surveyor                   | GCCCGTCAGCTAGGATTAGG       | TTGCTTCAGGAGGGAACGTC            |
| <i>Sh3bgr</i> Surveyor                   | AGCTGGTGAAGGAGAAAGC        | AGGAGCATGAAACACTCCCC            |
| <i>Ccl5</i> SNP PCR                      | GCCAGGTGATGTAGCAGACA       | CCACAACCTGGCCTTTTCAGT           |
| <i>Xaf1</i> genotyping                   | GAACCCACACAGGGGTACAG       | TCAGGCGGAGGACAGGAATA            |

738  
 739
